# Supplementary material for: Imaging local brain activity of multiple freely moving mice sharing the same environment
Source: PubMed Central journal article supplement (PMC6522513; doi:10.1038/s41598-019-43897-x), 2019-05-16
Supplement: 41598_2019_43897_MOESM1_ESM.pdf [file 41598_2019_43897_MOESM1_ESM.pdf]

1  
2  
3  
4  
5  
6  
7  
8  
9  
10  
11  
12  
13  
14  
15  
16  
17  
18  
19  
20

## **Imaging local brain activity of multiple freely moving mice sharing the same environment**

**Shigenori Inagaki<sup>1,5‡</sup>, Masakazu Agetsuma<sup>2,5§</sup>, Shinya Ohara<sup>3</sup>, Toshio Iijima<sup>3</sup>, Hideo Yokota<sup>4</sup>, Tetsuichi Wazawa<sup>2</sup>,  
Yoshiyuki Arai<sup>2</sup> & Takeharu Nagai<sup>1,2\*</sup>**

<sup>1</sup> Graduate School of Frontier Biosciences, Osaka University, Suita, Osaka 565-0871, Japan

<sup>2</sup> The Institute of Scientific and Industrial Research, Osaka University, Ibaraki, Osaka 567-0047, Japan

<sup>3</sup> Division of Systems Neuroscience, Tohoku University Graduate School of Life Sciences, Sendai, Miyagi 980-8577, Japan

<sup>4</sup> Image Processing Research Team, RIKEN Centre for Advanced Photonics, Wako, Saitama, 351-0198, Japan

<sup>5</sup> These authors contributed equally to this work.

‡ Present address: Graduate School of Medical Sciences, Kyushu University, Fukuoka 812-8582, Japan

§ Present address: Division of Homeostatic Development, Department of Developmental Physiology, National Institute for Physiological Sciences, Okazaki, Aichi 444-8585, Japan

\*Correspondence should be addressed to T. N.

ng1@sanken.osaka-u.ac.jp

Tel: +81-6-6879-8481

Fax: +81-6-6875-5724

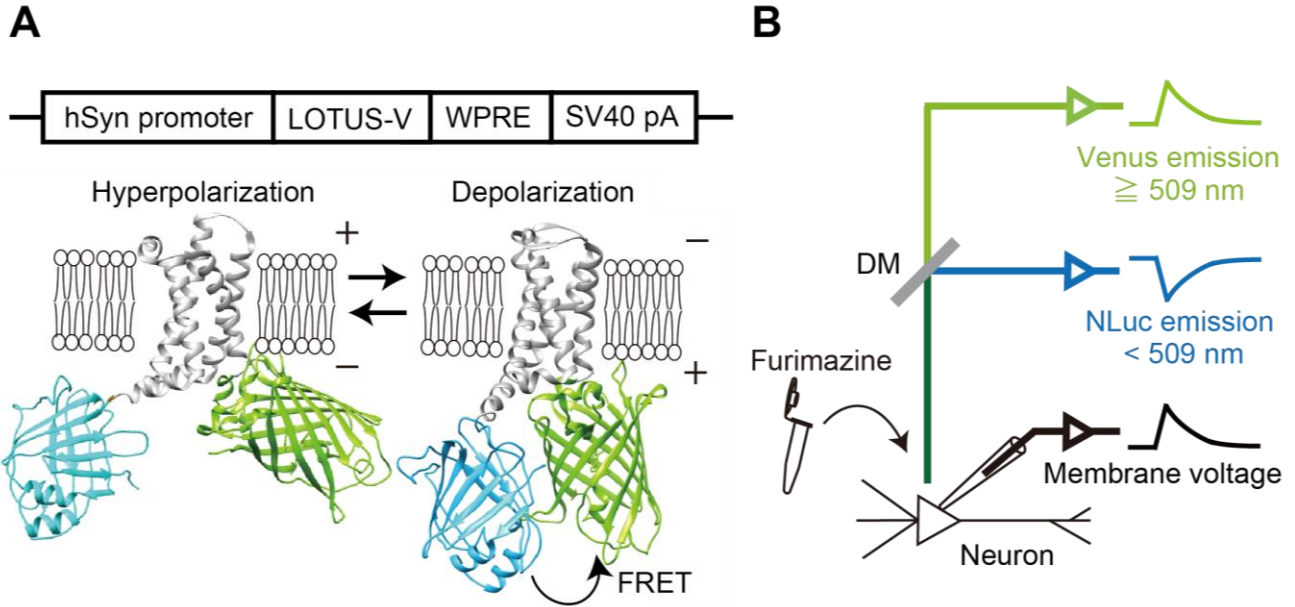

**Supplementary Figure 1. Schematic drawing of the LOTUS-V construct and in vitro bioluminescence imaging.** (A) LOTUS-V was expressed under the control of a hSyn (pan-neuronal) promoter. A woodchuck hepatitis virus post-transcriptional regulatory element (WPRE) and polyadenylation sequence (pA) are located downstream of the LOTUS-V gene to stabilize its mRNA (upper). The LOTUS-V was comprised of VSD (gray), NLuc (cyan), and Venus (yellowish green). The protein structure of VSD (4G7V) and Venus (GFP; 1KYS) were obtained from the Protein Data Bank (PDB), and that of NLuc was predicted by I-TASSER<sup>1</sup>. The structural change upon depolarization enhances Förster resonance energy transfer (FRET) efficiency between NLuc and Venus moieties, and causes a higher emission ratio (Venus/NLuc) (lower). (B) Bioluminescence from a cultured hippocampal neuron expressing LOTUS-V was split using a dichroic mirror, and separately recorded at the NLuc and Venus channels (<509 nm and  $\geq 509$  nm, respectively). Simultaneously, the LOTUS-V-expressing neuron was subjected to whole-cell patch-clamp recording. While the Venus signal was positively correlated with membrane voltage, the NLuc signal was anti-correlated with it because of the change in FRET efficiency. This emission ratio (Venus/NLuc) can robustly report membrane voltage of cultured hippocampal neurons.

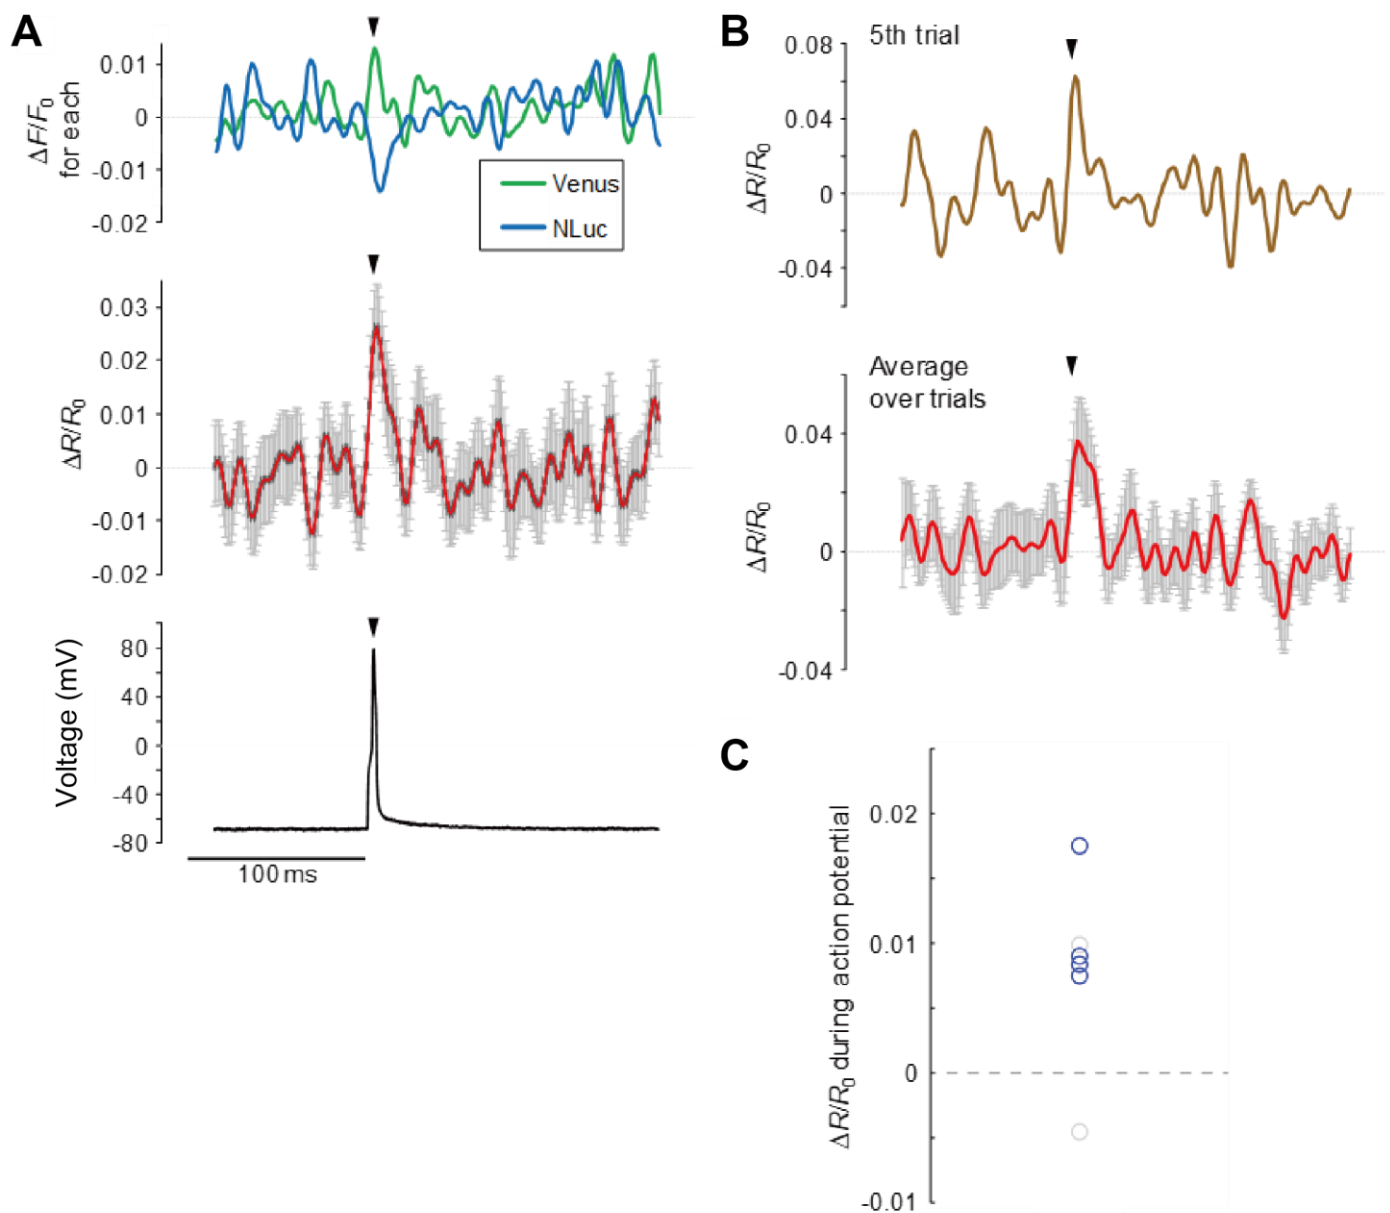

2 **Supplementary Figure 2. Summary of LOTUS-V signal change in primary cultures of hippocampal neurons during**  
 3 **neuronal firing.** (A) Compared to the change in the respective Venus and NLuc signals (top), the change in  $\Delta R/R_0$  (middle)  
 4 during the action potential (bottom) was clearer. The average of recorded data over all trials (n=32 in this case) are shown in  
 5 each panel. Arrow head, timing of the peak of the action potential. (B) In this example, even a single trial result (top) or  
 6 small number of averaged trials (bottom, mean  $\pm$  standard error over 8 trials) were sufficient to clearly demonstrated a  
 7 signal change during the action potential. (C) Summary of the signal changes during the action potential (N=6 cells, average  
 8 responses over trials). The majority of recorded cells independently demonstrated a significant increase of LOTUS-V  
 9 signals during the action potential. Four of six samples demonstrated a statistically significant increase ( $p < 0.05$  Wilcoxon  
 10 signed rank test), while one case showed a non-significant increase ( $p = 0.059$ ) and one showed a slight, but non-significant  
 11 decrease ( $p = 0.54$ ))

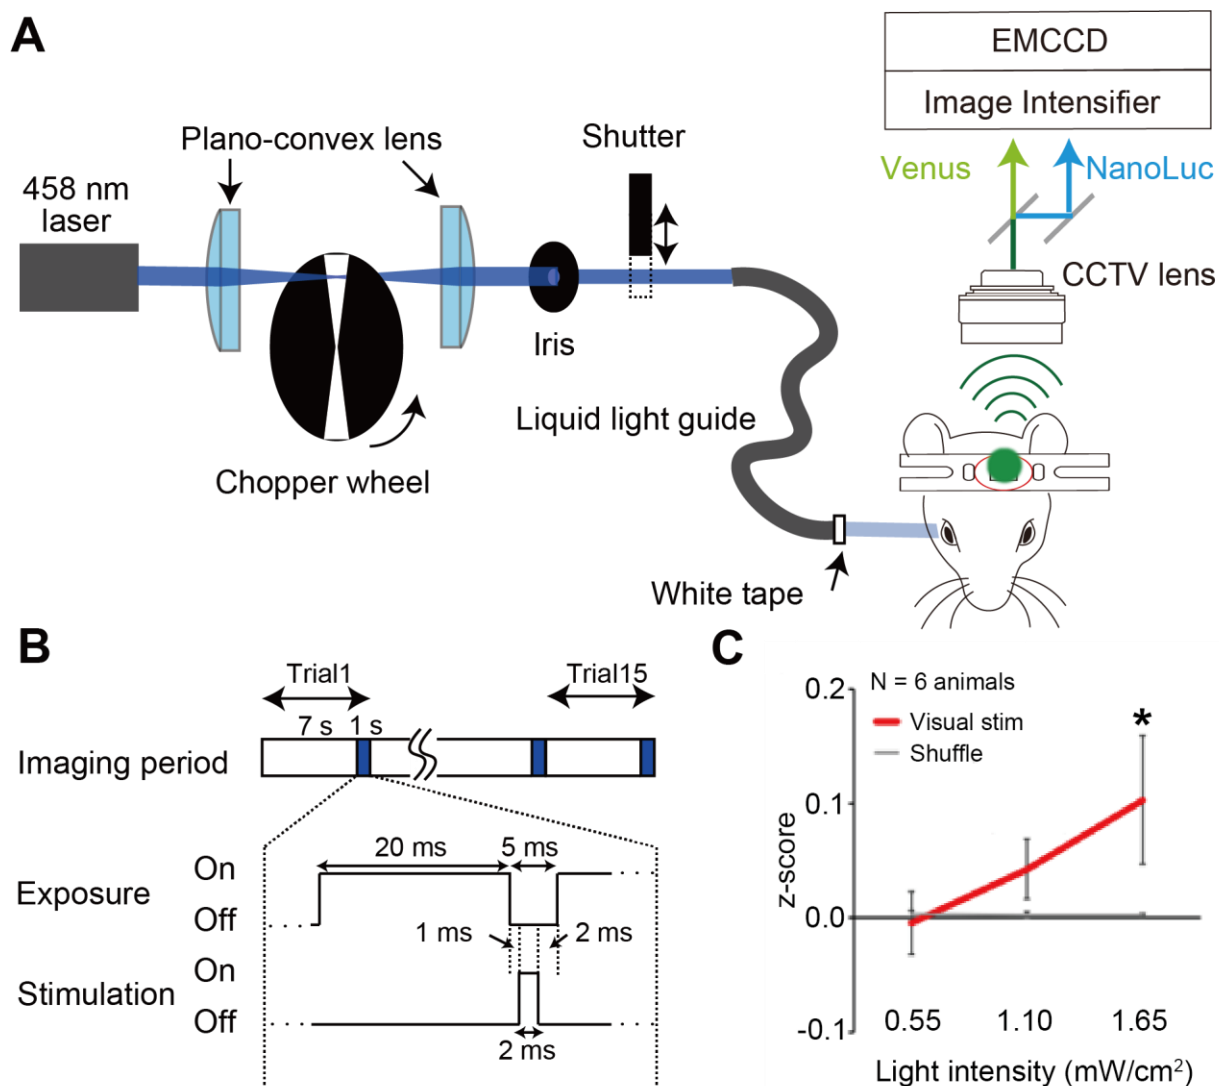

**Supplementary Figure 3. LOTUS-V signal in the mouse primary visual cortex (V1) reported a significant increase during visual stimulation.** (A, B) Optical design (A) and experimental configuration (B) of dead-time imaging of LOTUS-V bioluminescence signal (derived from the V1 of a head-fixed mouse) during a visual stimulation paradigm. (A) The blue laser was coupled to a liquid light guide through two plano-convex lenses, a chopper wheel, iris diaphragm, and optical shutter to generate the light pulse. Bioluminescence from the V1 area was split by a dichroic mirror, and was separately recorded at the NLuc and Venus channels ( $<509$  nm and  $\geq 509$  nm, respectively). (B) Exposure to the camera and visual stimulation during the processes for image readout and accumulated charge clearing on the camera (dead-time) were performed alternatively (blue; see also **Supplementary methods**). (C) There was a significant increase in LOTUS-V signals depending on the light intensities. Statistical analysis was conducted using a Wilcoxon signed rank test (N=6 mice, visual stimulation vs baseline at each light intensity). Although there were no significant differences from baseline with a weak light ( $0.55$   $\text{mW}/\text{cm}^2$ ), the response was greater with increasing light intensity. Strong light ( $1.65$   $\text{mW}/\text{cm}^2$ ) induced a significant change of the LOTUS-V signal. \*:  $p < 0.05$ , n.s., not significant.

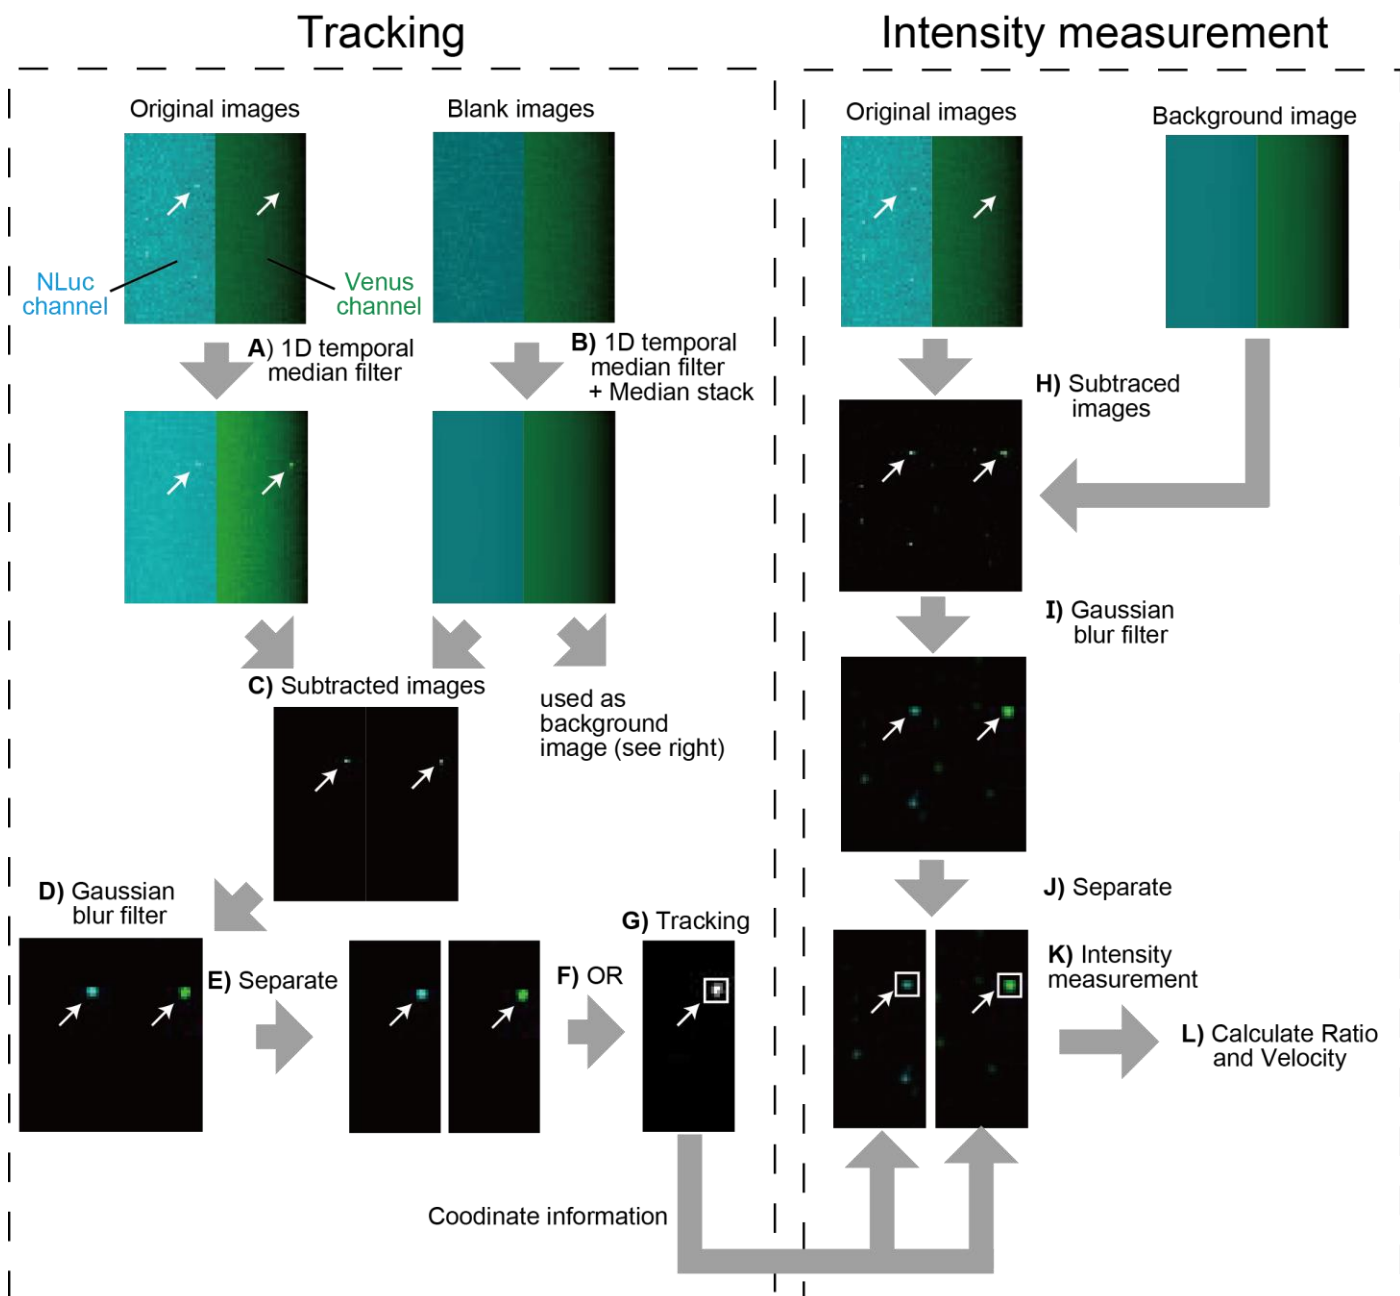

1  
2 **Supplementary Figure 4. Auto tracking method to obtain coordinate information and measure bioluminescence**  
3 **intensity of a freely moving mouse.** The images contain two pieces of color information (green pixels, pseudo-colored  
4 Venus channel; cyan pixels, pseudo-colored NLuc channel) obtained using the image splitting optics, and thus  
5 bioluminescence from V1 of a freely moving mouse can be observed as two bright spots (indicated by white arrows) in each  
6 original image frame. Since we used a relatively high gain of the image intensifier (4-5 out of 10 levels) to decrease the  
7 exposure time and increase the frame rate, the effect of dark noise observed as bright spots apart from the brain signal was  
8 not negligible. Therefore, we separately performed “Tracking” and “Intensity measurement” steps to obtain precise  
9 coordinate information and bioluminescence intensity of the bright spots (see **Supplementary methods**). (A) To remove the  
10 dark noise using temporal information (the dark noise rarely appears at the same place in two consecutive frames), the 1D  
11 median filter was applied to the temporal axis. (B) To correct inhomogeneous background level, more than 1,000 blank  
12 images were acquired when the camera’s shutter was closed to make a “background image”. The 1D temporal median filter  
13 was also used to remove the dark noise. Finally, the median stack along the temporal direction was used as a background  
14 image. (C) This background image was subtracted from each median-filtered bioluminescent image to adjust the  
15 background level. (D) Gaussian blur filter was used in each image frame with a radius value set to 1.0, in order to easily

1 identify the signal using the Auto tracking program. **(E)** The images were separated into NLuc and Venus channels, and  
2 their x-y coordinates were aligned with each other by referring to the bright-field images we took before the experiments.  
3 **(F)** The separated channels were merged into single reference images containing intensity information of both channels  
4 using the “OR” function. **(G)** The coordinate information of the bright spot was obtained using the “Particle Track Analysis  
5 (PTA)” (Image J plug-in). This information was only used to set the ROI on the bright spot and measure the signal intensity  
6 of Venus and NLuc channels at the following “intensity measurement” steps. **(H)** The original images “without” the 1D  
7 temporal median filter were background-subtracted. **(I)** Gaussian blur filter was used. **(J)** The images were separated into  
8 NLuc and Venus channels. **(K)** The intensities of the bright spot in both channels were measured by locating the ROI based  
9 on the coordinate information obtained by PTA **(G)**. **(L)** The ratio and velocity were calculated after measuring the  
10 bioluminescence intensity of both channels.

1  
2

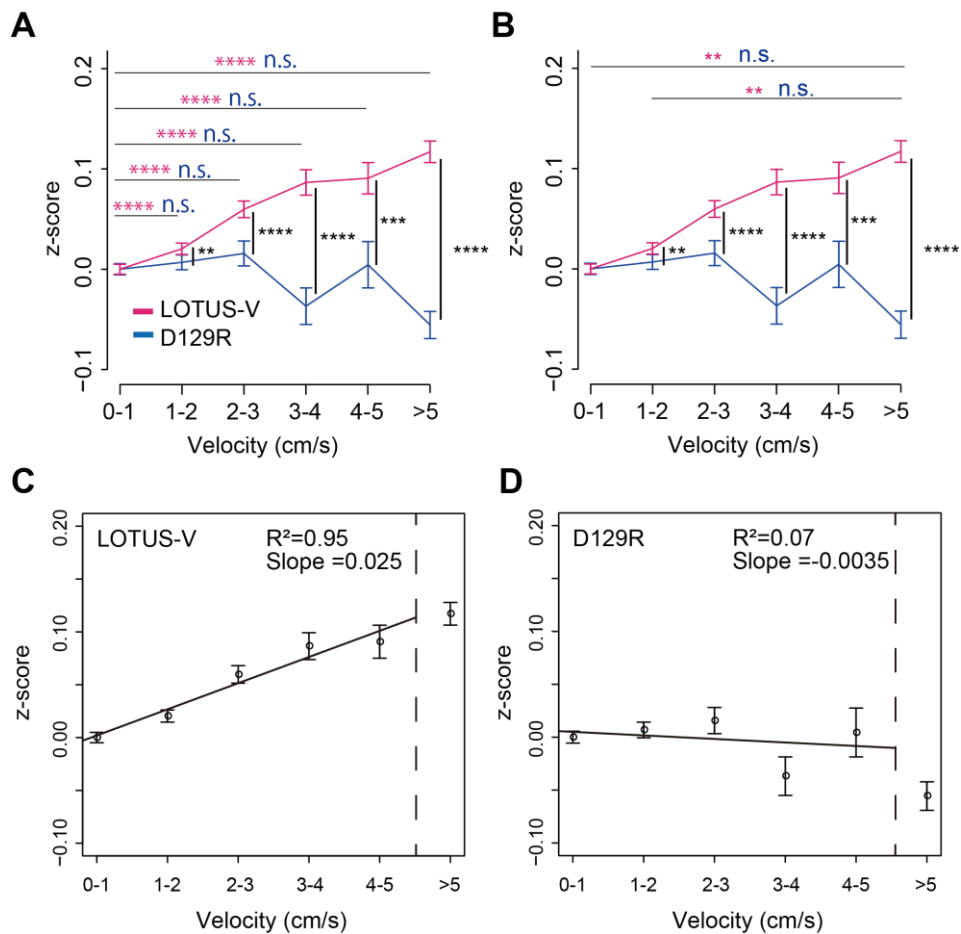

3

**Supplementary Figure 5. Evaluation of the locomotion-dependent artifact in LOTUS-V signal.** (A, B) To consider locomotion driven artifact, we compared signals of LOTUS-V with those of voltage-insensitive mutant, LOTUS-V(D129R) after categorizing data by locomotion speed of the mouse. The plots show z-normalized  $\Delta R/R_0$  from LOTUS-V (magenta) or LOTUS-V(D129R) (blue) -expressing and single-housed freely-moving mice in each velocity category (LOTUS-V, n =41005, 29712, 14255, 7296, 4889 and 13674 time-points from N =5 mice, for 0-1, 1-2, 2-3, 3-4, 4-5 and >5 cm/s, respectively; D129R, n =31648, 17771, 6418, 2889, 1949 and 4979 time-points from N=3 mice). (A)  $p < 0.0001$  and  $< 0.01$  for LOTUS-V and D129R respectively for Kruskal-Wallis test with all six categories, whereas the results of multiple comparison (calculated by Steel-Dwass test) shown in this panel as blue or magenta indicates substantial increase in LOTUS-V and no significant difference in LOTUS-V(D129R). We also performed Wilcoxon rank sum test to indicate the statistical differences between LOTUS-V and LOTUS-V(D129R), suggesting the locomotion-drive signal change in LOTUS-V was not the simple locomotion artifact. (B) In addition, we applied a linear mixed-effect model to consider the possibility that the samples from each mouse were correlated. ANOVA for the linear mixed-effect model indicates  $p < 0.05$  and n.s. for LOTUS-V and D129R, respectively. The results of the Tukey multiple comparison test for a linear mixed-effect model are shown in this panel as blue or magenta. (C, D) The plots from LOTUS-V (C) and LOTUS-V(D129R)-expressing mice (D) were line fitted by the least-squares method (without using the values in the over 5 cm/s category). Time bin, 0.1 s; n.s., not significant; \*\*,  $p < 0.01$ ; \*\*\*,  $p < 0.001$ ; \*\*\*\*,  $p < 0.0001$ .

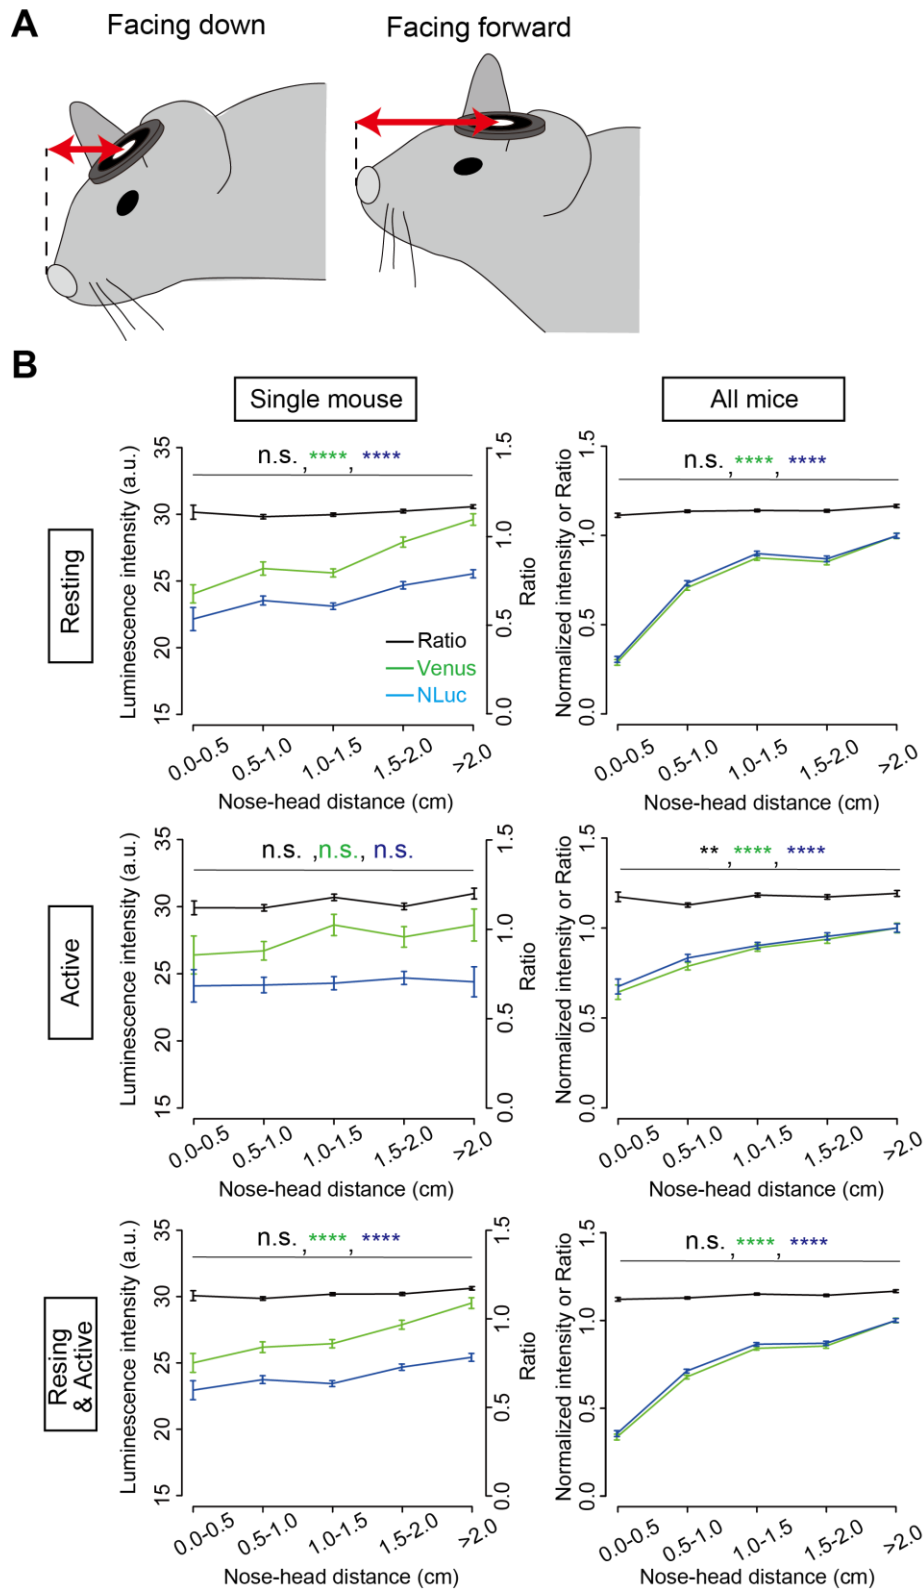

1

2 **Supplementary Figure 6. The head-angle dependent artifact was removed by calculating ratio.** (A) The schematic

3 illustrations show how we measured the length from the nose to the cranial window (nose-head length, red arrows). Since

4 this length of each mouse during free movement changes depending on the head angle, we calculated this value and

5 compared it with signal from the brain. (B) Plots indicate NLuc (blue), Venus (green) and ratio (black) signals in each

6 nose-head length category, in (left) a single representative mouse (resting, n =52, 378, 748, 782 and 858 time-points for

7 0.0-0.5, 0.5-1.0, 1.0-1.5, 1.5-2.0 and >2 cm, respectively; active, n =36, 182, 289, 214 and 98 time-points; resting and active,



1 n =88, 560, 1037, 996 and 956 time-points), or (**right**) all mice (resting, n =473, 1287, 1490, 1295 and 1067 time-points  
2 from N =3 mice; active, n =116, 549, 799, 514 and 342 time-points; resting and active, n =589, 1836, 2289, 1809 and 1409  
3 time-points). In a right panel, Venus and NLuc signals were normalized by the averages of the longest category (i.e. when  
4 the mouse head was directed horizontally) respectively. Ratio was calculated by dividing pre-normalized Venus signal by  
5 pre-normalized NLuc signal. Data not during the interaction with other mice (i.e. when distance between them was more  
6 than 4cm) was used. P-values were obtained using Kruskal-Wallis test with all five categories. In addition, we applied  
7 ANOVA for a linear mixed-effect model to consider the possibility that samples from each mouse were correlated. We  
8 found no significant difference between ratio values in each category (Resting, p=0.553; Active, p=0.053; Resting & Active,  
9 p=0.160). Time bin for the analyses, 0.1 s; Error bars indicate mean  $\pm$  standard error; n.s., not significant; \*\*, p<0.01; \*\*\*\*,  
10 p <0.0001.  
11  
12

1  
2  
3  
4  
5  
6  
7  
8  
9  
10  
11  
12  
13  
14  
15  
16  
17  
18  
19  
20

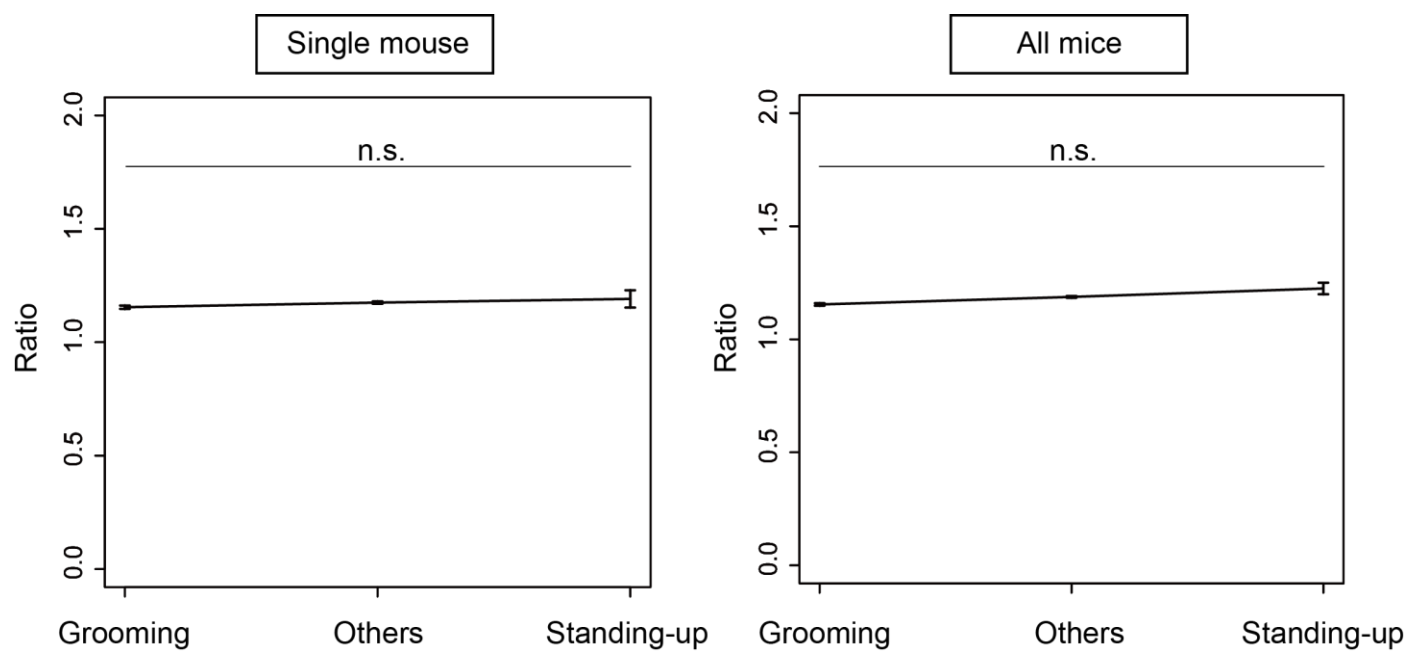

**Supplementary Figure 7. Vertical motion does not affect the LOTUS-V signal.** To confirm whether vertical motion affected the LOTUS-V signal, the ratio value of the LOTUS-V signal during mouse grooming and standing-up was evaluated in a single representative mouse (left; n =1334, 2880 and 64 time-points for grooming, others and standing-up, respectively), or all mice (right; n =2407, 5396 and 164 time-points, respectively). Data during the interaction with other mice (i.e., when distance between them was more than 4 cm) were not used. P-values were obtained using the Kruskal–Wallis test (**left**) and ANOVA for a linear mixed effect model (**right**). Time bin for the analyses, 0.1 s; Error bars indicate mean  $\pm$  standard error; n.s., not significant.

1  
2

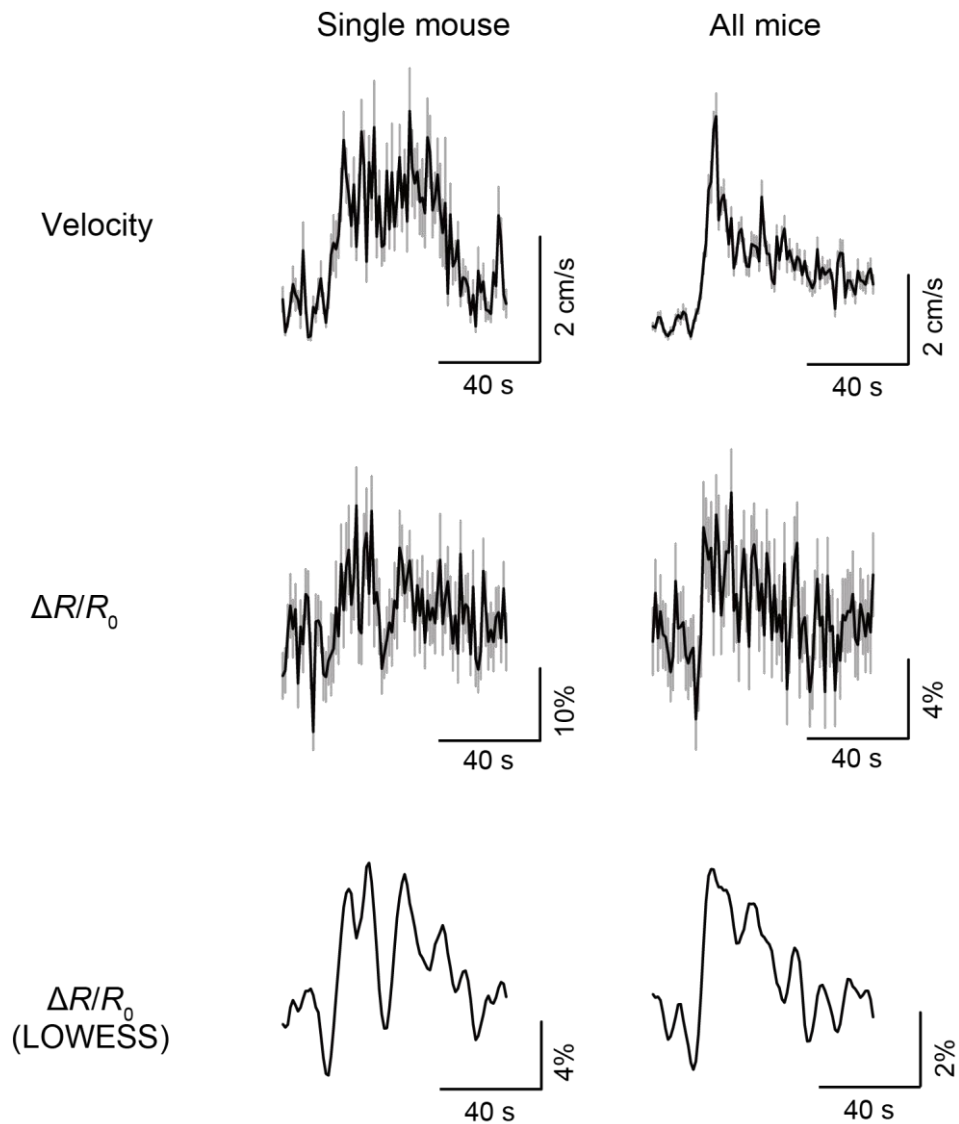

3  
4  
5  
6  
7  
8  
9  
10  
11  
12

**Supplementary Figure 8. Manual tracking data also showed dynamic change in LOTUS-V signal in V1 after the locomotion onset.** Averaged time series of locomotion velocity (upper panels) and LOTUS-V signal  $\Delta R/R_0$  (middle) of a single representative mouse (left, n =6 sessions) and all mice (right, n =27 sessions from N =3 mice) around the locomotion onset were plotted. Manual tracking data were exclusively used for this analysis. Lower panels show LOWESS-smoothed  $\Delta R/R_0$ . The Granger causality test statistically revealed the strong link between the locomotion velocity and the LOTUS-V signal ( $p < 0.0001$  for both “representative mouse” and “all mice”), suggesting that the change in the velocity might trigger the change in  $\Delta R/R_0$ . Time bin, 1 s; Error bars indicate mean  $\pm$  standard error.

1  
2  
3  
4  
5

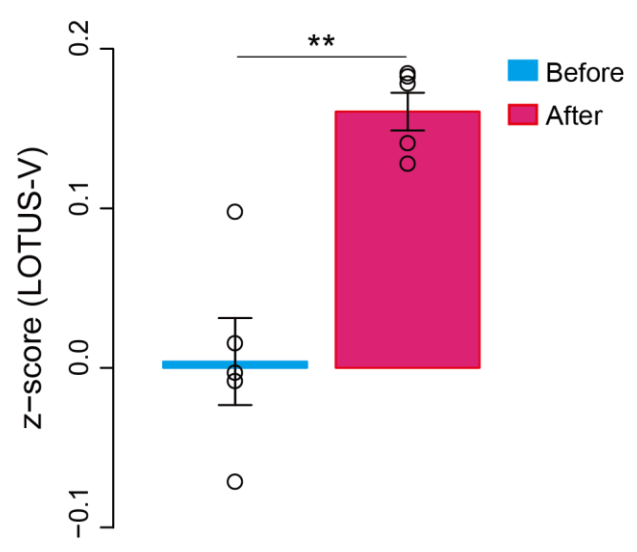

6  
7  
8  
9  
10  
11  
12  
13  
14

**Supplementary Figure 9. Statistical analysis of the signal change before and after the locomotion onset using manual tracking data.** The averages of z-normalized  $\Delta R/R_0$  of LOTUS-V expressing mice before (-19 s to 0 s) and after (1 s to 20 s) the locomotion onset were shown as bar graphs, while each circle indicates the value at each time point of “All mice” (shown in **Supplementary Fig. 7**). p-value shown in the panel was calculated using a Wilcoxon rank sum test. Time bin, 4 s; Error bars indicate mean  $\pm$  standard error; n.s., \*\*,  $p < 0.01$ .

1  
2  
3  
4  
5  
6  
7  
8  
9  
10  
11  
12  
13  
14  
15  
16  
17

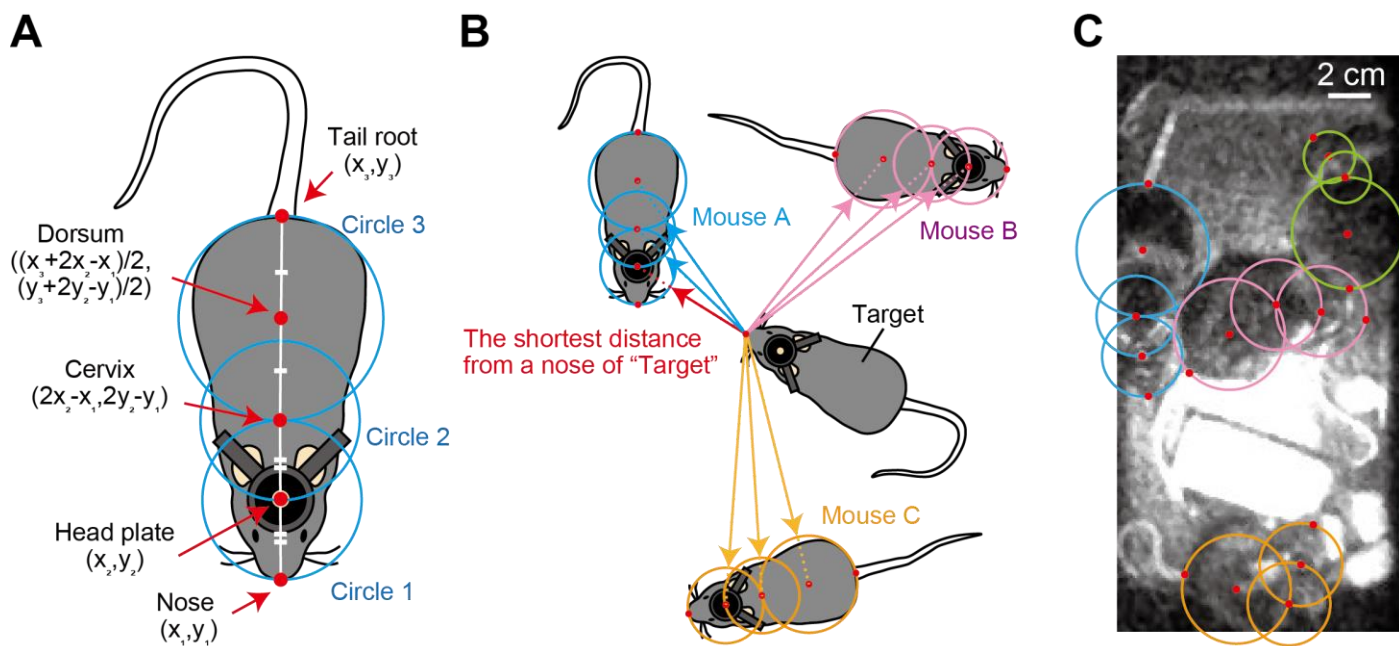

**Supplementary Figure 10. Measurement of the distance between interactively locomoting mice.** (A) Image illustrating the definition of the approximate areas of the mouse. The nose, center of the headplate, and tail root positions were manually tracked. This coordinate information was used to calculate the positions of the cervix and dorsum as indicated. The centers of the three variable circles were located at the headplate (Circle 1), cervix (Circle 2), and dorsum (Circle 3), respectively, as shown in the panel. The radius of each circle was set as the distance between the headplate and nose (i.e., Circle 1 and Circle 2, respectively), and the dorsum and tail root (Circle 3). (B) An image illustrating how the distances between the target mouse and other mice, interacting with one another, at each time-point were calculated. The distances between the nose of the target mouse and the closest edge of each circle were also calculated. Among them, the shortest distance was used as the score for the interaction analysis (red arrow). When the nose was the inside of the circle, the distance was represented as a negative value. (C) An example of an overlaid image of the bright field and approximate mouse areas. The color of each circle indicates the different individual mice.

1

2

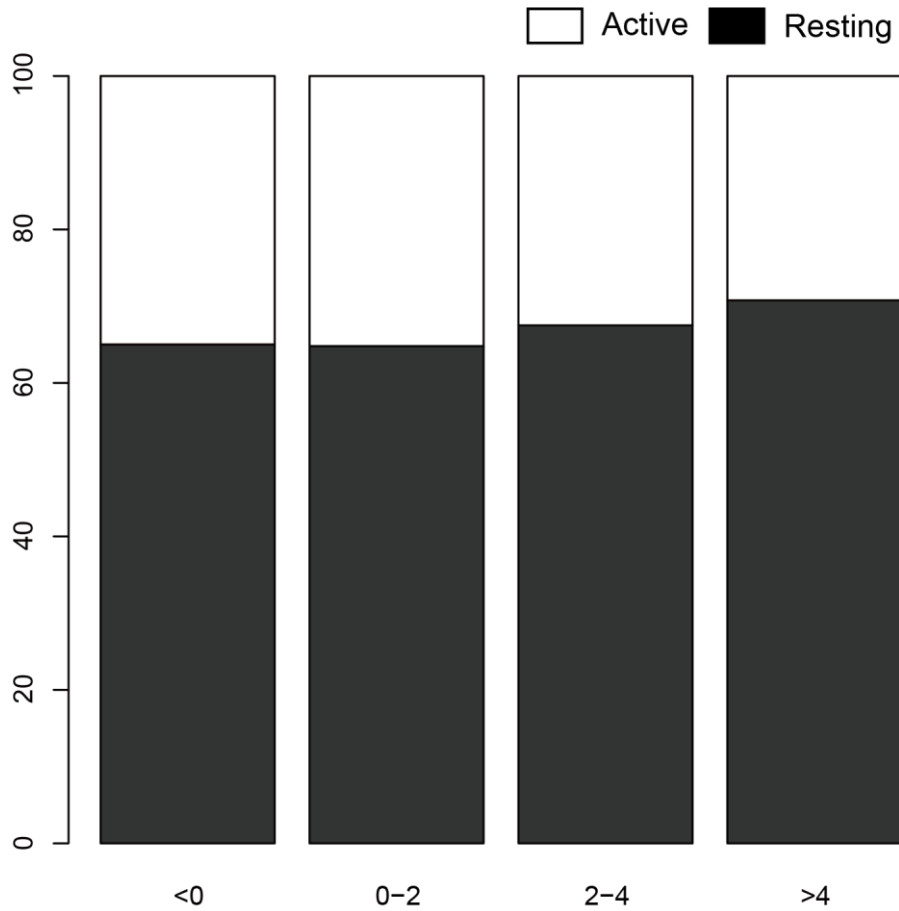

3

4

5

6

7

8

9

10

**Supplementary Figure 11. The fraction of resting and active states in each distance category.** Data from all mice are summarized (the resting state, n =3538, 7606, 5843, and 5612 time-points for <0, 0-2, 2-4, and >4 cm, respectively; the active state, n =1905, 4133, 2814, and 2320 time-points, respectively). The fractions of resting and active states were indicated as black and white boxes in the 100% stacked bar chart, respectively. Each bar corresponds to the distance category between the target mouse and closest mouse (see also **Supplementary Fig. 10**).

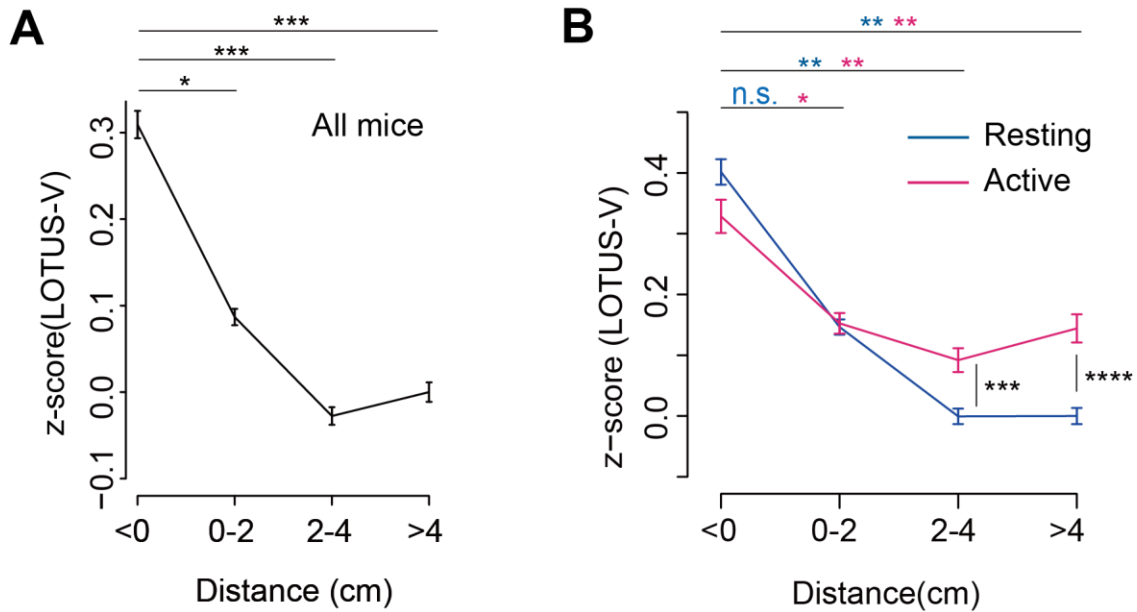

2

3 **Supplementary Figure 12. Analysis of interactively moving mice with a linear mixed-effect model.** To consider that the  
4 samples from each mouse are correlated, we analyzed the data in **Fig. 4C and D** with a linear mixed-effect model. **(A)**  
5 Distance-dependent change in the activity of the primary visual cortex (V1) of interactively locomoting mice. Plots represent  
6 z-normalized  $\Delta R/R_0$  of each distance category (distance between the target mouse nose and other mice, see also **Fig.4C** and  
7 **Supplementary Fig. 10**; n= 5443, 11739, 8657, and 7932 time-points for <0, 0–2, 2–4 and >4 cm, respectively). The distant  
8 values (>4 cm) were used as a baseline ( $R_0$ ) to calculate the z-normalization.  $p < 0.05$  for ANOVA for a linear mixed-effect  
9 model. P-values shown in the panel were calculated using the Tukey multiple comparison test for a linear mixed-effect  
10 model. **(B)** Comparison of distance-dependent change in V1 activity and the effect of locomotion (resting vs active states) (see also  
11 **Fig.4D**). Data from all mice were used (resting state (<1 cm/s, blue), n= 3538, 7606, 5843, and 5612 time-points for <0, 0–2,  
12 2–4, and >4 cm, respectively; active state (>1 cm/s, magenta), n= 1905, 4133, 2814, and 2320). The  $\Delta R/R_0$  in the “distant and  
13 resting” state was used as the baseline for z-normalization. P-values obtained using ANOVA for a linear mixed-effect  
14 model were used;  $p < 0.05$  in both states. P-values obtained using the Tukey multiple comparison test for a linear mixed-effect  
15 model are shown as blue (resting states) or magenta (active) symbols, while those obtained using the Wilcoxon rank sum test  
16 (to compare resting vs active) are shown in black. The time bin was 0.1 s. Error bars indicate mean  $\pm$  standard error; n.s., not  
17 significant; \*,  $p < 0.05$ ; \*\*,  $p < 0.01$ ; \*\*\*,  $p < 0.001$ ; \*\*\*\*,  $p < 0.0001$ .

18

19

1  
2

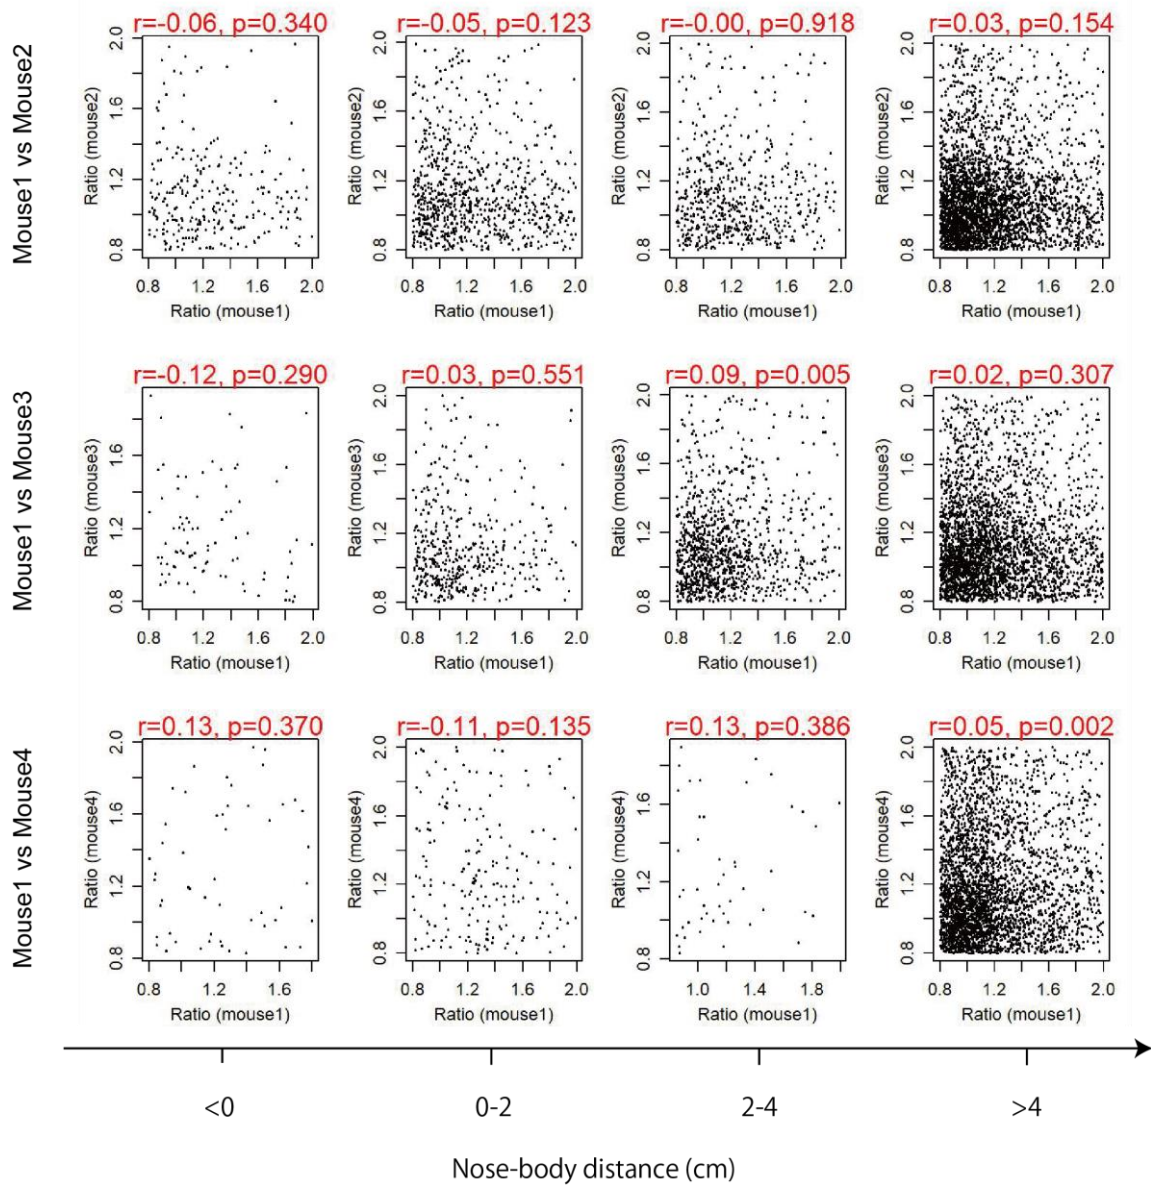

3  
4  
5  
6  
7  
8  
9  
10  
11

**Supplementary Figure 13. Test to confirm whether signal from one mouse might be leaked to the others of the close distance (Mouse1's nose to others' bodies).** The scatter plot indicates the relationship of brain signals (Venus/NLuc ratio) from two different mice in the same cage, at each distance category (Mouse1 vs Mouse2, n =233, 691, 466, and 2553 time-points for <0, 0–2, 2–4 and >4 cm, respectively; Mouse1 vs Mouse3, n =75, 365, 868, and 2477; Mouse1 vs Mouse4, n =43, 155, 41 and 2531). The distances were calculated as described in **Supplementary Fig. 10**. Pearson correlation coefficient (r) and p-value (p) from Pearson correlation test are indicated in each panel.



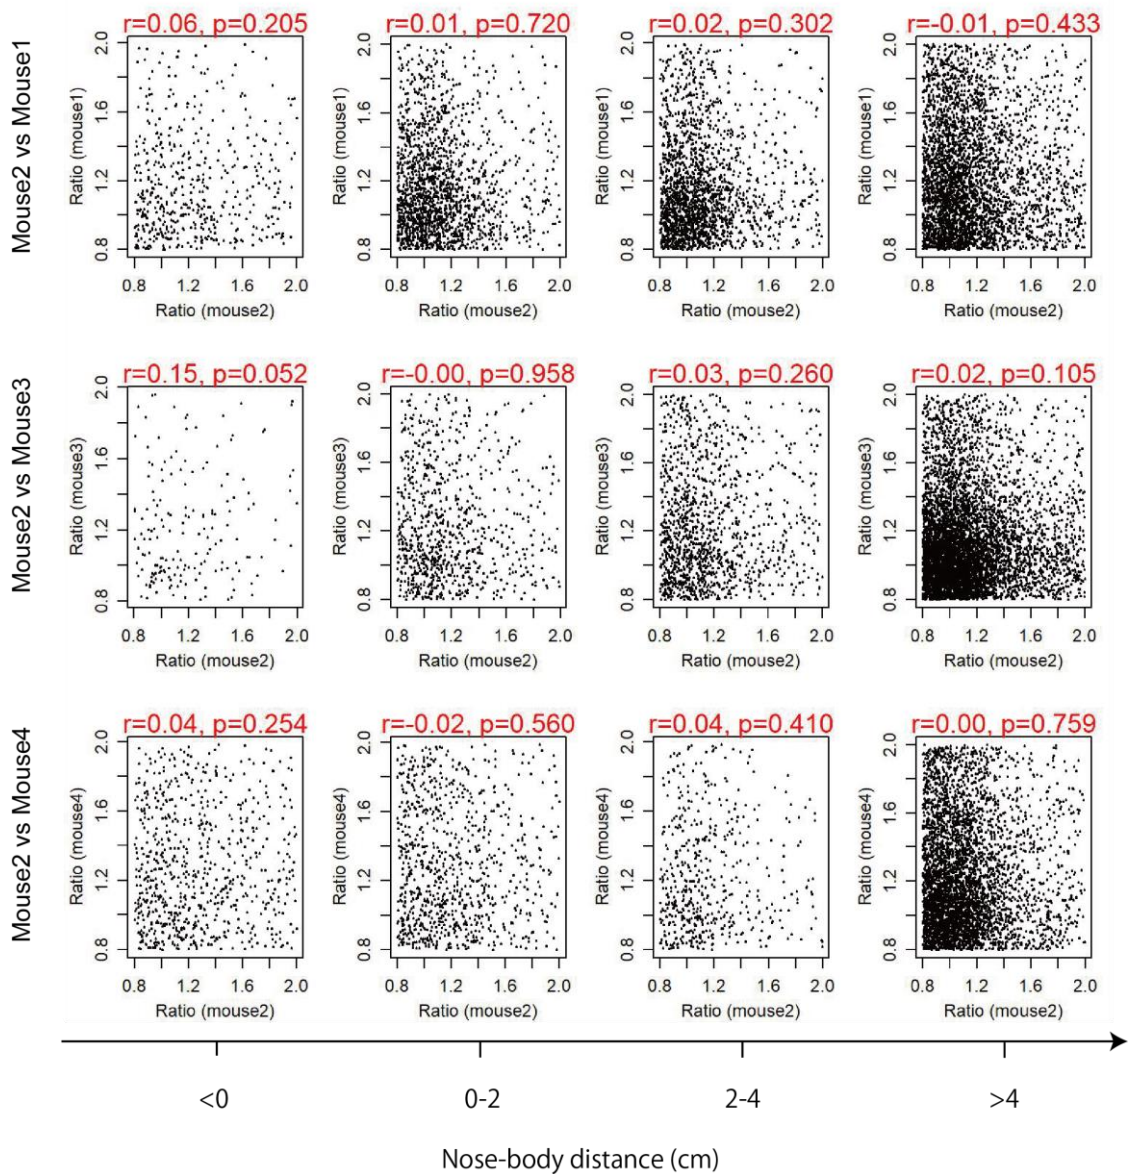

**Supplementary Figure 14. Test to confirm whether signal from one mouse might be leaked to the others of the close distance (Mouse2's nose to others' bodies).** The scatter plot indicates the relationship of brain signals (Venus/NLuc ratio) from two different mice in the same cage, at each distance category (Mouse2 vs Mouse1, n =391, 1371, 1521, and 2923 time-points for <0, 0–2, 2–4 and >4 cm, respectively; Mouse2 vs Mouse3, n =134, 625, 951, and 4392; Mouse2 vs Mouse4, n =539, 682, 399 and 3242). The distances were calculated as described in **Supplementary Fig. 10**. Pearson correlation coefficient (r) and p-value (p) from Pearson correlation test are indicated in each panel.

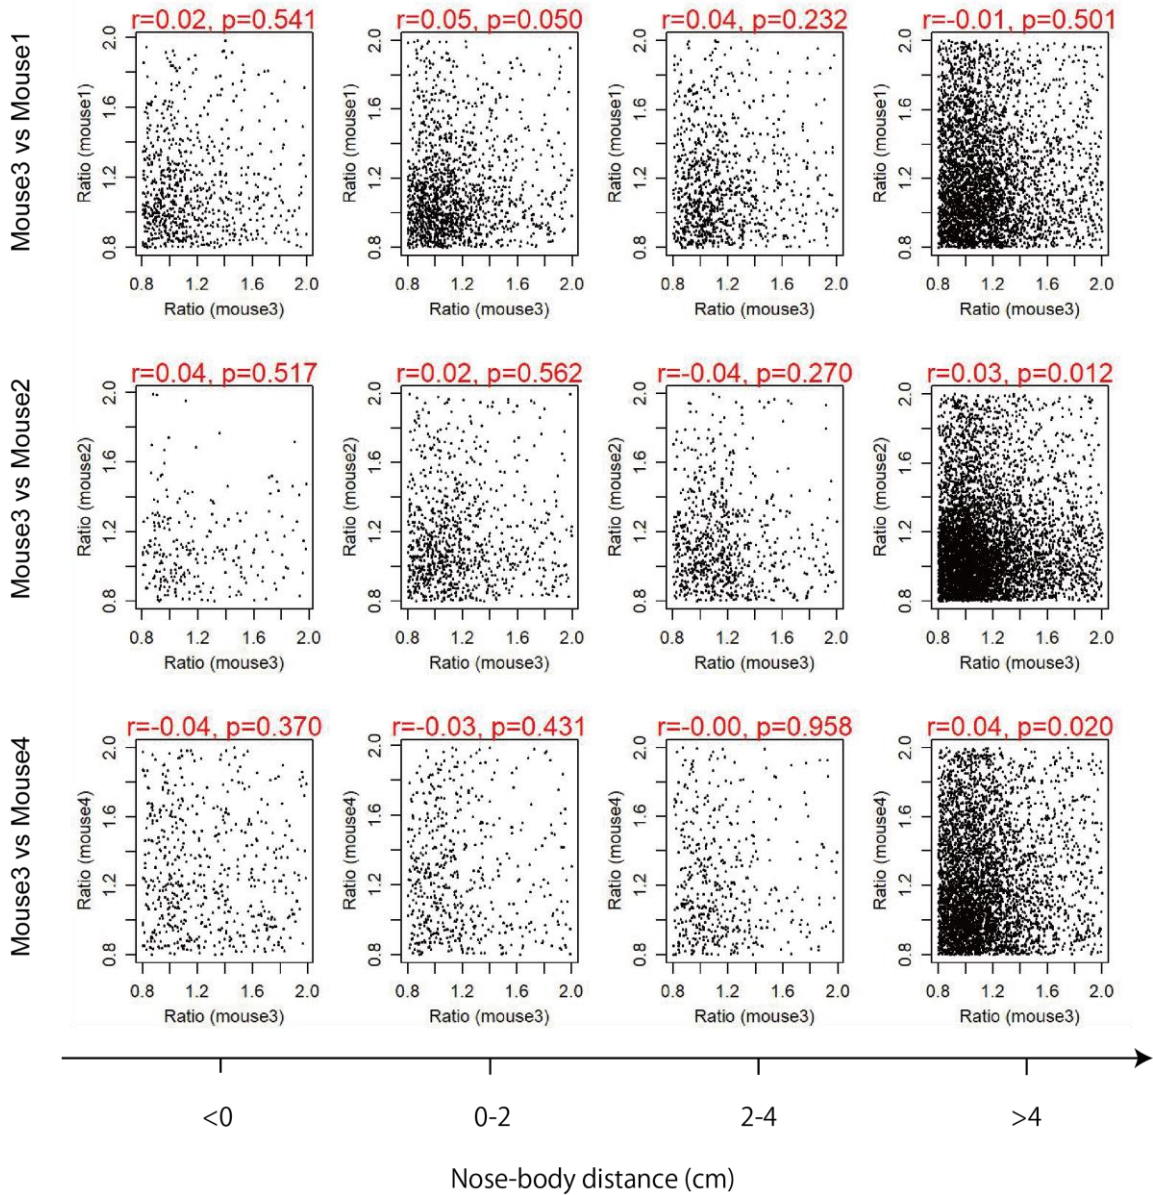

**Supplementary Figure 15. Test to confirm whether signal from one mouse might be leaked to the others of the close distance (Mouse3's nose to others' bodies).** The scatter plot indicates the relationship of brain signals (Venus/NLuc ratio) from two different mice in the same cage, at each distance category (Mouse3 vs Mouse1, n =584, 1154, 768, and 3035 time-points for <0, 0-2, 2-4 and >4 cm, respectively; Mouse3 vs Mouse2, n =188, 664, 597, and 4261; Mouse3 vs Mouse4, n =400, 383, 349 and 3237). The distances were calculated as described in **Supplementary Fig. 10**. Pearson correlation coefficient (r) and p-value (p) from Pearson correlation test are indicated in each panel.

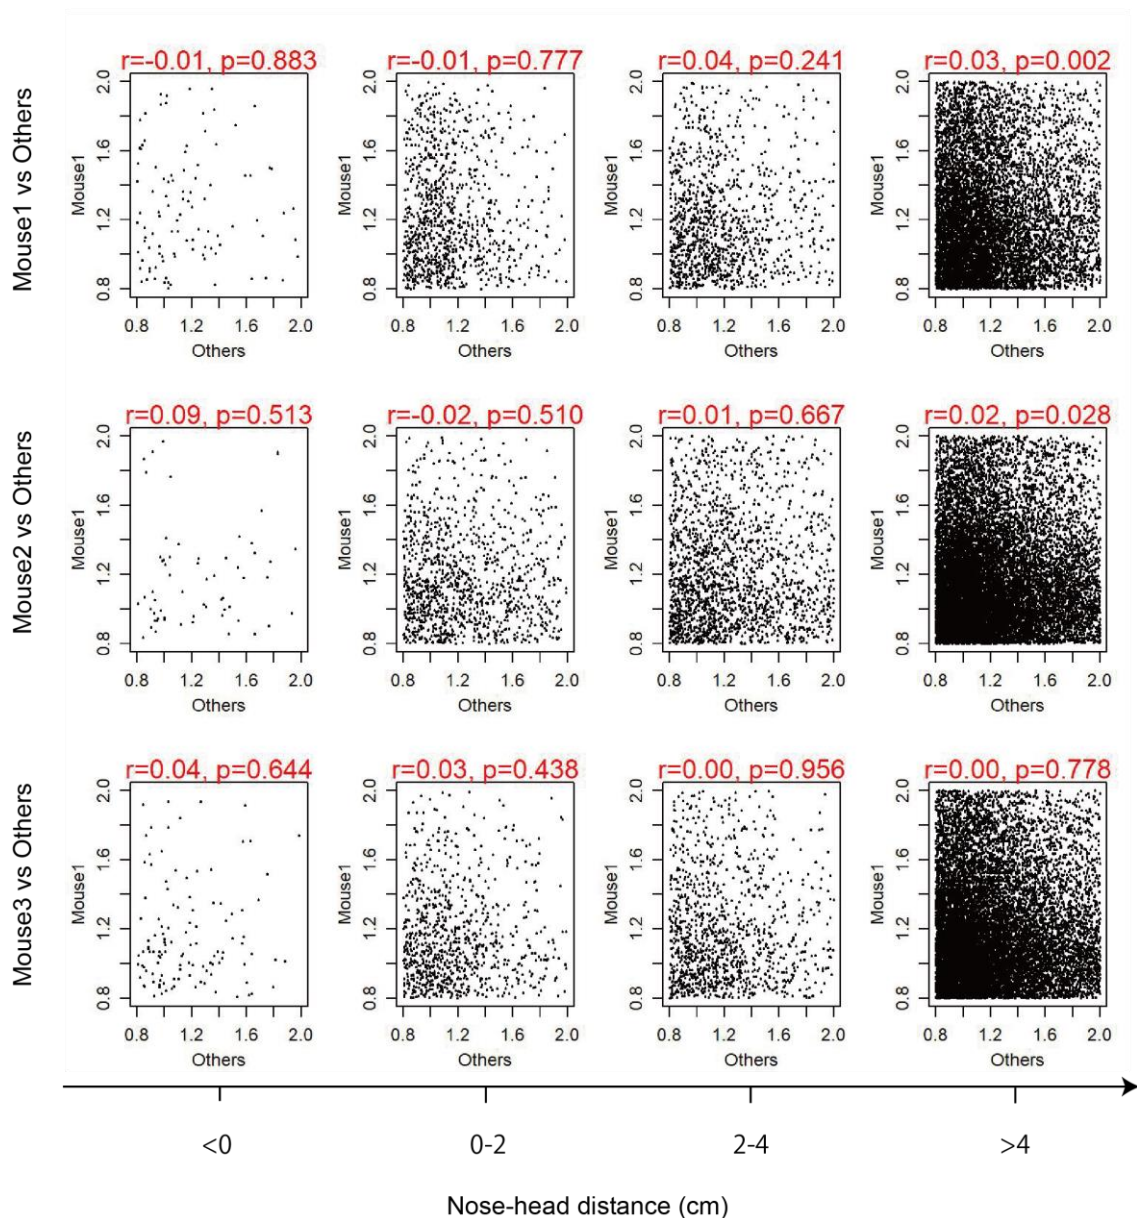

2

3 **Supplementary Figure 16. Test to confirm whether the signal from one mouse might be leaked to others because of**  
4 **the close distance (Mouse nose to others' head).** When the heads of two mice were closed, the signal could be more easily  
5 contaminated into another one. To test this possibility, the distances between the nose of the target mouse and the edge of  
6 the circle located on the head of the other mouse were calculated as described in **Supplementary Fig. 10**. The scatter plot  
7 indicates the relationship of brain signals (Venus/NLuc ratio) from two different mice in the same cage, according to each  
8 distance category (Mouse 1's nose vs other's head,  $n = 101, 940, 1096,$  and  $8361$  time-points for  $<0, 0-2, 2-4$  and  $>4$  cm,  
9 respectively; Mouse 2's nose vs other's head,  $n = 60, 1070, 1798,$  and  $14242$ ; Mouse 3's nose vs other's head,  $n = 115, 852,$   
10  $1146$  and  $13507$ ). Pearson's correlation coefficient ( $r$ ) and  $p$ -value ( $p$ ) from the Pearson's correlation test are indicated in  
11 each panel.

12

1  
2 **Supplementary Video 1.** Imaging of a single mouse expressing LOTUS-V in the primary visual cortex (V1). Overlay of  
3 bright field and LOTUS-V bioluminescence (green).

4  
5 **Supplementary Video 2.** Trajectory movie of the locomotion velocity and z-normalized  $\Delta R/R_0$  in a single mouse recording.  
6 Pseudo-color (blue to red) indicates 0 to 20 cm/s for velocity and -2.5 to 2.5 for z-normalized  $\Delta R/R_0$ , respectively.

7  
8 **Supplementary Video 3.** Imaging of multiple mice expressing LOTUS-V in the primary visual cortex (V1). Overlay of  
9 bright field and LOTUS-V bioluminescence (green).

10  
11 **Supplementary Video 4.** Trajectory movie of locomotion velocity and z-normalized  $\Delta R/R_0$  in multiple mice recording.  
12 Pseudo-color (blue to red) indicates 0 to 20 cm/s for velocity and -1 to 1 for z-normalized  $\Delta R/R_0$ , respectively.

### 13 14 15 **Supplementary methods**

16 **AAV preparation.** For the AAV expression system, the cDNA of LOTUS-V (GenBank accession number; LC061443) and  
17 LOTUS-V(D129R) were amplified from pcDNA3-CMV-LOTUS-V and pcDNA3-CMV-LOTUS-V(D129R) respectively,  
18 by polymerase chain reaction, using a sense primer, containing a Kozak sequence following a *Bgl*III site, and a reverse  
19 primer, containing a *Hind*III site and a stop codon. They were then ligated with pAAV2-hSyn<sup>2</sup> digested by *Bam*HI and  
20 *Hind*III. DNA sequencing was used to verify all constructs.

21 The AAV-DJ vector was prepared as described previously with some modifications<sup>3</sup>. Briefly, HEK293T cells  
22 (RIKEN BRC Cell Bank, RCB2202) were grown in Dulbecco's modified Eagle's medium (Sigma) containing  
23 heat-inactivated 10% FBS (Biowest) at 37 °C in 5% CO<sub>2</sub>. Equal amounts of pAAV2, pAAV-DJ<sup>4</sup>, and pHelper (Cell  
24 Biolabs, INC.) plasmids were co-transfected using FuGENE<sub>HD</sub> transfection reagent (Promega), following the  
25 manufacturer's protocol. The cells were trypsinized and centrifuged for 5 min at 1000 rpm at 4 °C, 3 days after infection.  
26 The pellet was resuspended in 200  $\mu$ l HEPES-buffered saline (10 mM HEPES, pH 7.3, containing 150 mM NaCl, 2.5 mM  
27 KCl, 1 M MgCl<sub>2</sub>, and 1 M CaCl<sub>2</sub>) and subjected to three freeze-and-thaw cycles. Then, 1  $\mu$ l of benzonase nuclease was  
28 added to each tube, warmed in a water bath at 45 °C for 15 min, and centrifuged for 10 min at 16,000 g at 4 °C. The  
29 supernatant was transferred into a new Eppendorf tube and centrifuged for 10 min at 16,000 g at 4 °C. Thereafter, the  
30 supernatant was transferred to a new Eppendorf tube and aliquots were stored at -80 °C until use.

31  
32 **Rat hippocampal neuron culture for imaging.** Primary cultures of hippocampal neurons and astrocytes were prepared  
33 from embryonic day 17 Sprague-Dawley rats. Cells were dissociated in plating medium consisting of Hanks' Balanced Salt

1 solution (HBSS; Wako), which was supplemented with 1 mM HEPES and 100 U/ml penicillin/streptomycin. The cells were  
2 then plated on a poly-L-lysine (Sigma) coated 35-mm dish with a coverslip bottom at a density of  
3  $3.5 \times 10^4$  cells/12-mm-diameter coverslip. The medium was changed to culture medium constituting of Neuro Basal (Thermo  
4 Fisher), supplemented with 2% B27 (Invitrogen) and L-glutamine, 5 h after plating, and the cultures were grown in 5% CO<sub>2</sub>  
5 at 37 °C. On day 7 *in vitro* (DIV-7), half of the medium was replaced with fresh culture medium. On DIV-14, the stock  
6 solution containing AAV vector was mixed with culture medium up to  $1.0 \times 10^{10}$  TU/ml. After 5 h of incubation, the medium  
7 was replaced to fresh culture medium. Cultures were incubated again at 37 °C in 5% CO<sub>2</sub>, and were used for experiments  
8 7–10 days after infection.

9  
10 **Electrophysiology and photometry.** LOTUS-V-expressing hippocampal cultured neurons were subjected to simultaneous  
11 patch-clamp and FRET recordings at 7–10 days post-infection. The medium was replaced with a bath solution consisting of  
12 HBSS (Gibco) supplemented with 20 mM HEPES (pH 7.2) and 5.5 mM D-Glucose, and the dish was mounted on an  
13 Axiovert 200M inverted microscope (Carl Zeiss). Patch-clamp recordings in the whole-cell mode were made using an  
14 Axoclamp 200B patch-clamp amplifier, with a capacitive head stage (Axon Instruments), using glass recording electrodes  
15 (3–5 MΩ) filled with intracellular solution (i.e., 140 mM potassium gluconate, 5 mM KCl, 1 mM MgCl<sub>2</sub>, 0.1 mM EGTA,  
16 2 mM Mg-ATP, 5 mM HEPES, adjusted to pH 7.2 with KOH). Whole-cell recordings were low-pass-filtered at 1 kHz and  
17 digitized at 10 kHz. Data were digitized with a Digi data 1342 digitizer (Axon Instruments) and fed into a computer for  
18 offline analysis using AxoClamp 9.0 software (Axon Instruments). Bioluminescence of LOTUS-V was observed by adding  
19 50 μM furimazine (Promega) and recordings were performed at 23°C. Images of the Venus and NLuc channels were  
20 acquired simultaneously using W-VIEW GEMINI image splitting optics (Hamamatsu Photonics), C8600-05 GaAsP image  
21 intensifier unit (Hamamatsu Photonics), and MiCAM Ultima-L CMOS camera (Brain Vision). The image splitting optics  
22 contained a FF509-FDi01-25×36 dichroic mirror (Semrock) and no emission filters. The optical signal was analyzed offline  
23 using BrainVision analyzer software.

24  
25 **Preparation for *in vivo* voltage imaging.** Viruses were injected to C57BL/6JJmsSlc mice at postnatal day P35-40 for *in*  
26 *vivo* experiments. Procedures were conducted as previously described<sup>5</sup>, with some modification. During surgery, mice were  
27 anesthetized with isoflurane (initially 2% partial pressure in air, and reduced to 1%). A small circle or a square (~1 mm in  
28 diameter) was thinned over the left V1 using a dental drill to mark the site for craniotomy and target the putative monocular

1 region. AAV-DJ vector was injected into the left V1 (2.1 mm lateral to the midline, 0.3 mm rostral to lambda at a depth of  
2 300  $\mu\text{m}$ ), over a 15-min period, using a UMP3 microsyringe pump (World Precision Instruments). The total volume of the  
3 AAV crude solution was 375 nl. The beveled side of the needle was faced to the left so that viruses could be injected into  
4 and cover the V1 area of the left hemisphere.

5 Mice were anesthetized by isoflurane (1–1.5%), at 3 weeks to 5 months after the virus injection, before the *in vivo*  
6 recording. *In vivo* two-photon imaging was performed as previously described<sup>5</sup> to confirm the expression level of  
7 LOTUS-V. Briefly, a titanium headplate was attached to the skull using dental cement, and the cranial window was made  
8 over the V1, around the virus injection site (1.5 mm in diameter) for subsequent imaging. The brain surface was covered  
9 with 4% agarose gel dissolved in HEPES-buffered saline (10 mM HEPES, pH 7.3, containing 150 mM NaCl, 2.5 mM KCl,  
10 1 M MgCl<sub>2</sub>, and 1 M CaCl<sub>2</sub>). HEPES-buffered saline was poured over the gel until we initiated bioluminescence imaging.  
11 The level and areas of expression were confirmed by imaging Venus signals with a FVMPE-RS two-photon microscope  
12 (Olympus) and a Mai Tai DeepSee Ti:sapphire laser (Spectra-Physics) at 920 nm, through a 4x dry objective, 0.28 N.A.  
13 (Olympus) or a 25x water immersion objective, 1.05 N.A. (Olympus). Scanning and image acquisition were controlled  
14 using FV30S-SW image acquisition and processing software (Olympus).

15 For the bioluminescence imaging, a solvent of furimazine solution (Nano-Glo luciferase assay system, Promega)  
16 was evaporated with a VDR-20G vacuum desiccator (Jeio Tech) and a BSW-50N belt drive rotary vane vacuum pump (Sato  
17 Vac Inc.) overnight under dark conditions. The precipitate was eventually dissolved in propylene glycol (up to 5 mM). This  
18 solution was kept at -30 °C as a stock solution and used for further imaging experiments.

19 For *in vivo* imaging from awake mice, we previously injected the substrate for the bioluminescence into mice  
20 through intraperitoneal or intravenous injection<sup>6</sup>. However, in these cases, it was difficult to introduce the high  
21 concentration substrate into the V1 area. Therefore, here we used a substrate-enclosed cranial window to directly deliver the  
22 substrate (~50  $\mu\text{M}$ ) into the target brain area. We attached a small o-ring (diameter: 10 mm) on the headplate using  
23 Kwik-Sil silicon adhesive (World Precision Instruments), as described in **Fig. 2D**. In some experiments, we alternatively  
24 used headplates consisting of an o-shaped window with a certain thickness (and two side bars to hold the mouse head)<sup>7</sup>.  
25 This circular pool area was used to keep the furimazine solution over the cranial window (~200  $\mu\text{l}$ ). During the  
26 bioluminescence imaging, the HEPES-buffered saline over the agarose gel was replaced with 50  $\mu\text{M}$  furimazine solution  
27 (dissolved in 200  $\mu\text{l}$  of the HEPES-buffered saline). This o-ring pool was eventually covered by a cover glass (15 mm

diameter) glued over the o-ring with the Kwik-Sil adhesive. To minimize the reflection of the bioluminescence from LOTUS-V-expressing neurons at the outside of the brain, the surrounding areas, including surface of the headplate and dental cement, were stained black using Touch Up Paint X-1 matte black (SOFT99). This was important to suppress noisy signals from the target area. Further, the inside of the mouse chamber that was used for imaging during free movement was stained black using a black guard spray (Fine Chemical Japan).

***In vivo* imaging of head-fixed mice.** For signal detection, we used a Lumazone *in vivo* luminescence imaging system (Molecular Devices) equipped with Evolve Delta 512 EMCCD camera (Photometrics), C8600-05 GaAsP high-speed-gated image intensifier unit (Hamamatsu Photonics), W-VIEW GEMINI image splitting optics (Hamamatsu Photonics), and AT-X M100 PRO D macro lens (Tokina) for the recording. Although C8600-05 GaAsP image intensifier unit was used for other experiments, including the recordings from a primary culture of hippocampal neurons and freely-moving mice, C9546-02 GaAsP high-speed-gated image intensifier unit (Hamamatsu Photonics) equipped with a gate function was used to protect the image intensifier unit from the large current evoked by the visual stimulation light. Bioluminescence emitted from samples during imaging was split by a FF509-FDi01-25×36 dichroic mirror (Semrock) and passed through emission filters (NLuc channel; FF02-472/30-25 and FF01-483/32-25, Venus channel; FF01-537/26-25 and FF01-542/27-25) in W-VIEW GEMINI image splitting optics (Hamamatsu Photonics). During the recording from head-fixed mice, the mouse head was held using the attached headplate, and the mouse was placed over the custom-made running disk (**Fig. 2E**), which was attached to the rotary encoder to record the running speed of the mouse under the control of LabView (National Instruments). The cranial window was placed around the center of the field of view and the camera binning was set to 4. The distance between the lens and the mouse was 100 mm and the area of FOV was 9.8×19.6 mm. The distance between the tip of the lens and the mouse, and the field of view (FOV) could be adjusted by selecting a lens suitable for the experimental purpose (**Fig. 2E**).

For visual stimulation (light illumination to the right eye) during the bioluminescence imaging (from left V1 neurons in awake mice), a 15, 30, or 45-mW blue laser from Sapphire 458 LP (Coherent) was coupled to 3-mm-diameter liquid light guide (Thorlabs) through F35 plano-convex lens (Sigma), chopper wheel (Thorlabs), F40 plano-convex lens (Sigma), iris diaphragm (Sigma), and 12.7-mm-aperture optical shutter (Thorlabs), as shown in **Supplementary Fig. 3A**. A thin white tape covered the tip end of the liquid light guide to sufficiently scatter the output light and protect the mouse

1 retina. The output power density of the 15, 30, and 45-mW blue laser was 0.55, 1.10, and 1.65 mW/cm<sup>2</sup>, respectively, at the  
2 surface level of the eye (there was a 1-cm distance between the eye and tip end of the liquid light guide).

3 During this experiment, a mouse head was fixed under the camera lens by holding the attached headplate as  
4 described above. Three different light intensities were sequentially tested for each mouse without changing the positions of  
5 the mouse head and tip of the optical fiber. Light pulses (2-ms duration for a single pulse, with a 23-ms interval (40 Hz))  
6 generated by a chopper wheel were delivered for 1 s, with an inter-trial interval of 7 s, using the optical shutter  
7 (**Supplementary Fig. 3B**). A total of 15 stimulus trials were repeated at each light intensity. Imaging was performed at  
8 40 Hz, and the exposure time was set to 20 ms so that images were captured only when the light illumination was off (called  
9 “dead-time imaging”)<sup>14,23</sup>. Therefore, a light-driven artifact was not present in the detected signals. Exposure and gate-on  
10 timing were controlled using a TTL signal from a multifunction generator (WF1973, NF Corporation), with the output  
11 signal from the optical chopper system acting as the trigger.

12  
13 ***In vivo* imaging of freely moving mice.** During *in vivo* imaging, the freely moving mice were placed in the cage and  
14 signals were detected using the same equipment used for imaging head-fixed mice, except that wide-angle lens  
15 (HF12.5SA-1, Fujinon), C8600-05 GaAsP image intensifier unit (Hamamatsu Photonics) and no emission filters were used.  
16 The camera binning was set at 2 and 8 to record multiple mice and a single mouse, respectively. The frame rate was set at  
17 10–100 Hz (they were adjusted according to the expression level and brightness of the bioluminescence to maintain a high  
18 signal-to-background ratio (SBR) and clearly identify the signal from the movie). The distance between the lens and the  
19 mice was 415–572 mm and the area of FOV was 132×264–170×340 mm. The distance between the tip of the lens and the  
20 mouse, and the field of view (FOV) could be adjusted by selecting the lens suitable for the experimental purpose (**Fig. 3A**).

21 The merged movies shown in **Supplementary Videos 1 and 3** were performed to confirm that the signal was  
22 correctly detected from the cranial window (**Supplementary Video 1**) or to capture the shapes of mice and target brain  
23 areas during imaging from multiple mice (**Supplementary Video 3**). These movies were produced using bright-field images  
24 acquired under a 632-nm Light Emitted Diode (LED) (LightEngine SPECTRA, Lumencor) illumination, and  
25 bioluminescence images acquired in the dark, which were captured alternately every 50 ms, as previously described<sup>6,8</sup>. The  
26 field of view was illuminated by LED with an irradiation time of 5 ms from the initiation of the camera exposure, once  
27 every two frames; the timing was controlled with a TTL signal from a multifunction generator (WF1973, NF Corporation).



1 The TTL signal was generated using the output signal from the exposure time-out signals from an EMCCD camera as the  
2 trigger.

3  
4 **Data analysis.** All imaging data were processed using Fiji, R-software (Version 3.2.2.) and MATLAB (Mathworks). The  
5 curve fitting was performed using Origin 8.5.1 (OriginLab).

6 Neuronal activity was measured by calculating the FRET ratio ( $R$ ) of LOTUS-V (Venus signal divided by NLuc  
7 signal) as previously described<sup>9</sup>. The background signal was subtracted from the signal of the specimen before the FRET  
8 ratio was calculated. The method of background subtraction depended on each imaging setup. For the cultured hippocampal  
9 neurons and head-fixed mouse imaging, the “background signal” in both NLuc and Venus channels, measured in a  
10 randomly chosen region of interest (ROI) and placed at a non-specimen area, was subtracted from the signal of the  
11 specimen in each channel. When the freely moving mice were imaged, the “background image,” that was made by median  
12 stack from 1000 blank images taken with the closed shutter of an EMCCD camera, was subtracted from the acquired images.  
13 The change in the FRET ratio ( $\Delta R/R_0$ ) was calculated by subtracting the average value in the baseline ( $R_0$ ) from individual  
14 raw values at each time-point ( $\Delta R = R_t - R_0$ ;  $R_t$  is a raw value at time-point “ $t$ ”) and further dividing the difference,  $\Delta R$ , by  
15 the  $R_0$ . The meaning of the term “baseline” also depended on the experiment or analysis. During *in vitro* experiments in  
16 cultured hippocampal neurons, the term “baseline” meant that neurons were at the resting membrane voltage. The term  
17 “baseline” for locomotion analysis, however, meant that the mice were immobile and not moving (resting state,  $<5$  cm/s for  
18 head-fixed mice,  $<1$  cm/s for tracking data from freely-moving mice; the threshold of each was set based on the level of  
19 noise fluctuation of the detected the velocity when mice were actually not moving, and by referring to a previous study<sup>10</sup>).  
20 The term “baseline” for the interaction analysis meant that a mouse was distant enough from others (distant state,  $>4$  cm) or  
21 in the “distant and resting” state, while for the visual stimulation trials, it meant that a mouse was in the resting state during  
22 the absence of stimulation.

23 Each single imaging frame acquired via the W-VIEW GEMINI image splitting optics (Hamamatsu Photonics)  
24 contained information from two channels (Venus and NLuc signals), at either the left or right side. To align the two-channel  
25 data during post-processing, we first acquired non-bioluminescence images under white light so that the shape of the neuron  
26 (*in vitro*), cranial window (head-fixed mice), or cage (freely moving mice) could be similarly observed in each channel.  
27 These reference frames were separated to each channel. Then, using the coordinate information, the two channels of the

1 actual imaging movies were aligned so that we could calculate the LOTUS-V FRET ratio ( $R$ ) using common ROIs. During  
2 the *in vitro* and head-fix experiments, drifting or motion-based shift of the sample was rarely observed. However, to  
3 confirm that the ROI could correctly work in all frames of each movie, we performed motion correction as previously  
4 described<sup>5</sup>.

5 When we analyzed movies of primary culture of hippocampal neurons, the ROI was created from a mask image,  
6 which was made based on an averaged picture over all frames of each movie (with single-channel data). The threshold for  
7 bioluminescence intensity was manually determined to cover the expression area (e.g., top 0.5%; however, we obtained  
8 similar results using a variety of thresholds). The following Boltzmann function was used to fit the voltage-sensitive curve in  
9 primary hippocampal neuronal cultures:

$$\frac{\Delta R}{R_0} = \frac{C_1}{1 + \exp\left(\frac{Ze(V - V_{1/2})}{kT}\right)} + C_2$$

11 where,  $C_1$  and  $C_2$  were constant values,  $e$  was the elementary electric charge,  $Z$  was the effective valence,  $k$  was the  
12 Boltzmann constant,  $T$  was the room temperature in K, and  $V_{1/2}$  was the voltage at which  $\Delta R/R_0$  is half-activated.

13 To analyze voltage kinetics, we fitted the activation and deactivation curves of  $\Delta R/R_0$  using the following  
14 two-component exponential equation:

$$\frac{\Delta R}{R_0} = C_3 \exp\left(-\frac{t - t_0}{\tau_1}\right) + C_4 \exp\left(-\frac{t - t_0}{\tau_2}\right) + C_5$$

16 where,  $C_3$ ,  $C_4$ , and  $C_5$  were constant values ( $C_3$  and  $C_4$  were used to calculate the fraction of  $\tau_{\text{fast}}$ ),  $t_0$  was the initial  
17 time-point, and  $\tau_1$  and  $\tau_2$  were the time constants for the fast and slow components.

18 The protocol used for *in vitro* experiments were also used to create the ROIs when analyzing the data from the movies  
19 of head-fixed mice. The relationship between the LOTUS-V signal and mouse locomotion was analyzed as described above.

20 When imaging the freely moving single-housed mice, the bioluminescent spot derived from the cranial window in  
21 the field of view was automatically tracked using the “Particle Track Analysis” (PTA ver 1.2;  
22 <https://github.com/arayoshipta/projectPTAj>) as described in **Supplementary Fig. 4**. When analyzing data of interactively  
23 moving mice, the cranial window in the headplate seen in the bright-field image was manually tracked using “Manual  
24 Tracking” (ImageJ plugin). The trajectories shown in **Figs. 3B, 4A, Supplementary Videos 2 and 4**, were pseudo-colored,  
25 based on the velocity or z-normalized  $\Delta R/R_0$ .

1 Since we used a relatively high gain of the image intensifier (4-5 out of 10 levels) to decrease the exposure time and  
2 increase the frame rate, the dark noise observed as bright spots apart from the bioluminescent signal easily contaminated the  
3 images, which was often misrecognized as the signal by PTA for automatic tracking analysis. Thus, we separately  
4 performed the “tracking step” and “intensity measurement step” (**Supplementary Fig. 4**). For the tracking part, we used the  
5 filtered images in which the effect of dark noise was minimized with a temporal filter (**Supplementary Fig. 4**, “Tracking”).  
6 In contrast, the non-filtered images were used for precise intensity measurement of the bioluminescent spots, based on the  
7 coordinate information obtained with automatic tracking analysis (**Supplementary Fig. 4**, “Intensity measurement”). Based  
8 on the fact that the dark noise rarely appeared at the same pixels in two consecutive frames, the bioluminescence and blank  
9 images were processed using the 1D temporal median filter (which is equivalent to a 3D median filter whose (x,y,t) radii are  
10 equal to (0,0,1); median filtering at every 3 frames) to reduce the noise (**Supplementary Figs. 4A and B**). In addition, to  
11 correct the inhomogeneous background level caused by the camera itself, a background image (described as “blank images”  
12 in **Supplementary Fig. 4**) was made by more than 1000 blank images acquired when the camera’s shutter was closed. This  
13 background image was subtracted from the filtered bioluminescence images (**Supplementary Figs. 4B and C**). The  
14 gaussian blur filter was then applied with a radius value set to 1.0 to further decrease the noise and make the identification  
15 of the actual brain signal easier in the PTA (**Supplementary Fig. 4D**). The filtered bioluminescence images were separated  
16 into NLuc and Venus channels and aligned with each other, by referring to the bright-field image taken before the  
17 experiments to visualize and register the position of the mouse cage in each channel (**Supplementary Fig. 4E**). The  
18 separated and aligned channels were merged using the “OR” function of Image J to make more reliable reference images  
19 (**Supplementary Fig. 4F**). By tracking the bright spot in the eventual images using PTA, we obtained the coordinate  
20 information (**Supplementary Fig. 4G**). Since the signal intensity at each channel (not the calculated FRET ratio) was  
21 affected by the angle of the mouse head (as shown in **Supplementary Fig. 6**), some of the frames were difficult to  
22 automatically track due to the low SBR. Therefore, when the coordinate information could not be automatically detected in  
23 more than 3 frames using PTA, these missed frames were excluded from the analysis. If the signal appeared within 3 frames  
24 (i.e., with two frames missed at most) from the position where the last signal was detected, then the PTA recognized them  
25 as a series, placed the ROI at their position, and continued automatic tracking (in these cases, linear interpolation was used  
26 to fill the missing signal values).

1 For the further “intensity measurement” step, the bioluminescence images of NLuc and Venus channels were  
2 prepared again from the same movie “without” the process of 1D temporal median filter (**Supplementary Figs. 4H-J**). The  
3 intensities from the bioluminescent spots in both channels at each time point were measured by locating ROIs based on the  
4 coordinate information obtained in the previous step (**Supplementary Fig. 4K**). When measuring the signal intensity (i.e.,  
5 averaged pixel values within the ROI), 32 bit images offered more unbiased intensity measurement than 16 bit images,  
6 especially if the bioluminescent signal intensity was low and more easily affected by photon shot noise. This is because 32  
7 bit images allow the negative pixel values that can contain intensity information lower than the value of the background  
8 image (i.e., the averaged image from more than 1,000 blank images), during the step of background subtraction  
9 (**Supplementary Fig. 4H**)<sup>11</sup>. In some frames, the signal intensity obtained by locating the ROI was slightly smaller than 0,  
10 which is also often observed in a single-molecule analysis<sup>11</sup>. Since these negative values can disperse the distribution of the  
11 ratio value (Venus intensity divided by NLuc intensity), the absolute minimum value through a series of the imaging  
12 sessions (e.g., several movies taken for a specific mouse) was added to the all values in both the NLuc and Venus channels,  
13 respectively. If the signal intensity in the NLuc or Venus channel was 0, the frame at that time point was removed before  
14 data analysis. Finally, we calculated the Venus/NLuc ratio values (**Supplementary Fig. 4L**). The velocity of the mouse was  
15 also calculated from the frame-by-frame position changes at the center of the gravity of the bioluminescence signal derived  
16 from the mouse brains.

17 For the manual tracking analysis, we tracked the position of the cranial window in the headplate by referring the  
18 bright-field images. After manually detecting the coordinate information, we measured NLuc and Venus signals as we did  
19 for the automatic tracking analysis and calculated the ratio values.

20 Dark noise during imaging was main and strong source of artifacts (0~0.8), which was sometimes much stronger  
21 than the actual signals (>2.0), and often overlapped with the bioluminescence signal in the image. To minimize the effect of  
22 the dark noise, ratios within the 0.8–2.0 range was selectively used for data analysis. This range was carefully set by  
23 referring to the result of the head-fixed mouse (the averaged ratio value plus or minus threefold the value of standard  
24 deviation, N=8 mice).

25 The SBR was calculated by dividing the averaged intensity of NLuc and Venus emissions by the background  
26 intensity. Automatic tracking could not properly distinguish the bioluminescence signal from dark noise when the SBR was  
27 lower than 0.12 (due to substrate consumption and/or an original low-expression level of LOTUS-V). Thus, low SBR data

1 were excluded from the analysis. The total imaging period for each mouse was estimated by the duration of high SBR (0.12  
2 or higher).

3 When imaging multiple mice, 1 mouse (of the 4 mice) was relatively immobile and did not voluntarily interact with  
4 others (**Fig. 4, Supplementary Videos 3 and 4**). To quantitatively evaluate how immobile each mouse was, the fraction  
5 of the active state ( $>1$  cm/s)<sup>10</sup> was calculated. Although the average fraction of the mice used for the free-moving  
6 experiments was  $64.2 \pm 7.8\%$  [mean  $\pm$  SE.] (N=11 mice), that of the quiet one (N=1) was only 2.1%. Following justification  
7 of the normal distribution of the data (Kolmogorov–Smirnov test,  $p > 0.05$ , N=12 mice), a “Chi-squared test for outliers”  
8 systematically detected this quiet mouse as an outlier ( $p < 0.05$ ). Therefore, the data of this mouse was excluded from the  
9 analysis.

10 To statistically compare results obtained from different mice expressing either LOTUS-V or LOTUS-V(D129R),  
11 the  $\Delta R/R_0$  in each mouse was z-normalized<sup>12</sup> to obtain “z-normalized  $\Delta R/R_0$ ”. The z-score values were calculated by  
12 subtracting the average baseline signals from individual raw values, and further dividing the difference by the baseline  
13 standard deviation. When we analyzed the data during visual stimulation, first 0.5 s of data was used as the signals during  
14 visual stimulation, while baseline (resting state) signals were calculated by randomly choosing the same number of frames  
15 (with that of data during visual stimulation) from whole resting state data of each mouse for respective comparisons (i.e.,  
16 10,000 repeats of random choices were used to calculate the representative (average) value for each “mouse,” at each light  
17 intensity; or one time random selection to obtain a group of baseline signals for each “trial” at each light intensity).

18 When analyzing the activity of V1 during the interaction of multiple mice, the area and the position of each mouse  
19 in the 2D image were also approximated using three circles (**Supplementary Fig. 10A**), by referring to a previous study<sup>13</sup>.  
20 The positions of the nose ( $x_1, y_1$ ), headplate ( $x_2, y_2$ ), and tail root ( $x_3, y_3$ ) were manually tracked. This coordinate  
21 information was further used to calculate the positions of the cervix ( $(2x_2 - x_1, 2y_2 - y_1)$ ) and dorsum ( $((x_3 + 2x_2 - x_1)/2, (y_3 + 2y_2$   
22  $- y_1)/2$ ). The centers of three variable circles were then set at the headplate (Circle 1), cervix (Circle 2), and dorsum (Circle  
23 3), respectively. The radius of each circle was set as the distance between the headplate and nose (for Circle 1 and Circle 2),  
24 or that between the dorsum and tail root (for Circle 3). Thereafter, the distances between the nose of the target mouse and  
25 edge of circles of other mice were calculated (**Supplementary Fig. 10B**). The shortest one was used as a “nose-to-body  
26 distance” for the interaction analysis (**Supplementary Figs. 10B and C**). When the nose was the inside of the circle of other  
27 mice, the distance was represented as a negative value.

1 Since LOTUS-V reported an increase of V1 activity by visual stimulation (**Supplementary Fig. 3C**), one might be  
2 concerned that bioluminescence from other mice could work as visual input. To exclude this possibility, we evaluated the  
3 power density of LOTUS-V bioluminescence from the V1 surface. The number of photons,  $P$ , collected on an EMCCD  
4 camera sensor was calculated from the total analogue-to-digital converter (ADC) counts,  $I$ , using the following equation:

$$5 \quad P = \frac{IA_d}{Qt_{\text{ex}}G},$$

6 where,  $A_d$  was the analog to digital conversion factor of an EMCCD camera,  $Q$  was the quantum efficiency of an EMCCD  
7 camera,  $t_{\text{ex}}$  was the exposure time, and  $G$  was the radiant emittance gain of an image intensifier unit. Since the ray  
8 divergence,  $\theta$  from the bioluminescent object was small enough, the fraction of the collected photons,  $F$ , was calculated  
9 using the following equation:

$$10 \quad F = \frac{\pi(W_d \tan \theta)^2}{2\pi W_d^2},$$

11 where  $W_d$  was the working distance of a lens.

12 Therefore, the bioluminescence intensity,  $B$ , radially emitted from the V1 surface was calculated using the  
13 following equation:

$$14 \quad B = \frac{hcP}{\lambda F},$$

15 where,  $h$  was the Planck constant,  $c$  was the speed of light; and  $\lambda$  was the wavelength. Accordingly, the power density of  
16 LOTUS-V bioluminescence from V1 surface was computed to be  $(7.6 \pm 1.0) \times 10^{-9}$  and  $(9.0 \pm 1.3) \times 10^{-9}$  mW/cm<sup>2</sup> (N=6 mice),  
17 at 480 nm and 540 nm, respectively. Since the weakest visual stimulation (0.55 mW/cm<sup>2</sup>) did not influence the LOTUS-V  
18 signal (**Supplementary Fig. 3C**), the increase of V1 activity during the interaction was unlikely to be caused by the  
19 bioluminescence from other mice (**Figs. 4C and D**).

## 22 Supplemental References

- 23 1. Roy, A., Kucukural, A. & Zhang, Y. I-TASSER: a unified platform for automated protein structure and function  
24 prediction. *Nat. Protoc.* **5**, 725–738 (2010).
- 25 2. Zhao, Y. *et al.* Microfluidic cell sorter-aided directed evolution of a protein-based calcium ion indicator with an inverted  
26 fluorescent response. *Integr. Biol. (Camb)*. **6**, 714–25 (2014).
- 27 3. Inutsuka, A. *et al.* Concurrent and robust regulation of feeding behaviors and metabolism by orexin neurons.  
28 *Neuropharmacology* **85**, 451–460 (2014).

- 1 4. Grimm, D. *et al.* In vitro and in vivo gene therapy vector evolution via multispecies interbreeding and retargeting of  
2 adeno-associated viruses. *J. Virol.* **82**, 5887–5911 (2008).
- 3 5. Agetsuma, M., Hamm, J. P., Tao, K., Fujisawa, S. & Yuste, R. Parvalbumin-Positive Interneurons Regulate Neuronal  
4 Ensembles in Visual Cortex. *Cereb. Cortex* **28(5)**, 1831–1845 (2018).
- 5 6. Saito, K. *et al.* Luminescent proteins for high-speed single-cell and whole-body imaging. *Nat. Commun.* **3**, 1262 (2012).
- 6 7. Goldey, G. J. *et al.* Removable cranial windows for long-term imaging in awake mice. *Nat. Protoc.* **9**, 2515–2538 (2014).
- 7 8. Matsushita, J. *et al.* Fluorescence and Bioluminescence Imaging of Angiogenesis in Flk1-Nano-lantern Transgenic Mice.  
8 *Sci. Rep.* **7**, 46597 (2017).
- 9 9. Inagaki, S. *et al.* Genetically encoded bioluminescent voltage indicator for multi-purpose use in wide range of bioimaging.  
10 *Sci. Rep.* **7:42398**, (2017).
- 11 10. Saleem, A. B., Ayaz, A., Jeffery, K. J., Harris, K. D. & Carandini, M. Integration of visual motion and locomotion in  
12 mouse visual cortex. *Nat. Neurosci.* **16**, 1864–1869 (2013).
- 13 11. Wang, Y. *et al.* Single molecule FRET reveals pore size and opening mechanism of a mechano-sensitive ion channel.  
14 *Elife* **3**, e01834 (2014).
- 15 12. Herry, C. *et al.* Switching on and off fear by distinct neuronal circuits. *Nature* **454**, 600–6 (2008).
- 16 13. de Chaumont, F. *et al.* Computerized video analysis of social interactions in mice. *Nat. Methods* **9**, 410–417 (2012).
- 17
